# Supplementary material for: Efficacy of conventional treatment with composite resin and atraumatic restorative treatment in posterior primary teeth: study protocol for a randomised controlled trial
Source: PubMed Central journal article supplement — BMJ Open. 2017 Jul 10;7(7):e015542. doi: 10.1136/bmjopen-2016-015542 (PMC5734398; doi:10.1136/bmjopen-2016-015542), 2017-07-10
Supplement: bmjopen-2016-015542.draft_revisions.pdf [file bmjopen-2016-015542.draft_revisions.pdf]

# BMJ Open

## Efficacy of conventional treatment with composite resin and atraumatic restorative treatment in posterior primary teeth: study protocol for a randomized controlled trial

|                                 |                                                                                                                                                                                                                                                                                                                                                                                                                                                                                                                                                                                                                                                                                                                                                                                                                                                                                                                                                                            |
|---------------------------------|----------------------------------------------------------------------------------------------------------------------------------------------------------------------------------------------------------------------------------------------------------------------------------------------------------------------------------------------------------------------------------------------------------------------------------------------------------------------------------------------------------------------------------------------------------------------------------------------------------------------------------------------------------------------------------------------------------------------------------------------------------------------------------------------------------------------------------------------------------------------------------------------------------------------------------------------------------------------------|
| Journal:                        | <i>BMJ Open</i>                                                                                                                                                                                                                                                                                                                                                                                                                                                                                                                                                                                                                                                                                                                                                                                                                                                                                                                                                            |
| Manuscript ID                   | bmjopen-2016-015542                                                                                                                                                                                                                                                                                                                                                                                                                                                                                                                                                                                                                                                                                                                                                                                                                                                                                                                                                        |
| Article Type:                   | Protocol                                                                                                                                                                                                                                                                                                                                                                                                                                                                                                                                                                                                                                                                                                                                                                                                                                                                                                                                                                   |
| Date Submitted by the Author:   | 20-Dec-2016                                                                                                                                                                                                                                                                                                                                                                                                                                                                                                                                                                                                                                                                                                                                                                                                                                                                                                                                                                |
| Complete List of Authors:       | Ladewig, Nathalia; Universidade de Sao Paulo Faculdade de Odontologia, Orthodontics and Pediatric Dentistry<br>Saihara, Cintia ; Universidade de Sao Paulo Faculdade de Odontologia, Orthodontics and Pediatric Dentistry<br>Yoshioka, Laysa ; Universidade de Sao Paulo Faculdade de Odontologia, Orthodontics and Pediatric Dentistry<br>Olegário, Isabel; Universidade de Sao Paulo Faculdade de Odontologia, Orthodontics and Pediatric Dentistry<br>Floriano, Isabela; Universidade de Sao Paulo Faculdade de Odontologia, Orthodontics and Pediatric Dentistry<br>Tedesco, Tamara; Universidade Ibirapuera, Pediatric Dentistry<br>Mendes, Fausto; Universidade de Sao Paulo Faculdade de Odontologia, Orthodontics and Pediatric Dentistry<br>Braga, Mariana; Universidade de Sao Paulo Faculdade de Odontologia, Orthodontics and Pediatric Dentistry<br>Raggio, Daniela; Universidade de Sao Paulo Faculdade de Odontologia, Orthodontics and Pediatric Dentistry |
| <b>Primary Subject Heading</b>: | Dentistry and oral medicine                                                                                                                                                                                                                                                                                                                                                                                                                                                                                                                                                                                                                                                                                                                                                                                                                                                                                                                                                |
| Secondary Subject Heading:      | Dentistry and oral medicine, Health economics, Paediatrics, Patient-centred medicine                                                                                                                                                                                                                                                                                                                                                                                                                                                                                                                                                                                                                                                                                                                                                                                                                                                                                       |
| Keywords:                       | HEALTH ECONOMICS, ORAL MEDICINE, PAEDIATRICS                                                                                                                                                                                                                                                                                                                                                                                                                                                                                                                                                                                                                                                                                                                                                                                                                                                                                                                               |
|                                 |                                                                                                                                                                                                                                                                                                                                                                                                                                                                                                                                                                                                                                                                                                                                                                                                                                                                                                                                                                            |

SCHOLARONE™  
Manuscripts

1  
2  
3 1 Efficacy of conventional treatment with composite resin and atraumatic  
4  
5 2 restorative treatment in posterior primary teeth: study protocol for a  
6  
7 3 randomized controlled trial  
8

9  
10 4

11 5 **Nathalia Miranda Ladewig**

12 6 Department of Pediatric Dentistry, School of Dentistry, University of São Paulo, São

13  
14  
15  
16 7 Paulo, Brazil

17  
18 8 nladewig@usp.br

19  
20  
21 9 **Cíntia Saori Sahiara**

22  
23 10 Department of Pediatric Dentistry, School of Dentistry, University of São Paulo, São

24  
25 11 Paulo, Brazil

26  
27 12 cintia.saihara@usp.br

28  
29  
30 13 **Laysa Yoshioka**

31  
32 14 Department of Pediatric Dentistry, School of Dentistry, University of São Paulo, São

33  
34 15 Paulo, Brazil

35  
36 16 laysa.yoshioka@usp.br

37  
38 17 **Isabel Olegário**

39  
40 18 Department of Pediatric Dentistry, School of Dentistry, University of São Paulo, São

41  
42 19 Paulo, Brazil

43  
44 20 isabel.costa@usp.br

45  
46  
47 21 **Isabela Floriano**

48  
49 22 Department of Pediatric Dentistry, School of Dentistry, University of São Paulo, São

50  
51 23 Paulo, Brazil

52  
53 24 isabelafloriano@usp.br

54  
55  
56  
57 25

1  
2  
3 **26 Tamara Kerber Tedesco**

4  
5 27 Department of Pediatric Dentistry, School of Dentistry, University of Ibirapuera, São

6  
7 28 Paulo, Brazil

8  
9 29 tamarakt@usp.br

10  
11 **30 Fausto Medeiros Mendes**

12  
13 31 Department of Pediatric Dentistry, School of Dentistry, University of São Paulo, São

14  
15 32 Paulo, Brazil

16  
17 33 fmmendes@usp.br

18  
19 **34 Mariana Minatel Braga**

20  
21 35 Department of Pediatric Dentistry, School of Dentistry, University of São Paulo, São

22  
23 36 Paulo, Brazil

24  
25 37 mmbraga@usp.br

26  
27 **38 Daniela Prócida Raggio**

28  
29 39 Department of Pediatric Dentistry, School of Dentistry, University of São Paulo, São

30  
31 40 Paulo, Brazil

32  
33 41 danielar@usp.br

34  
35 42

36  
37 **43 Corresponding author**

38  
39 44 Daniela Prócida Raggio

40  
41 45 Faculdade de Odontologia da Universidade de São Paulo

42  
43 46 Av. Lineu Prestes, 2227

44  
45 47 São Paulo – SP – Brazil

46  
47 48 05508-000

48  
49 49 E-mail: danielar@usp.br

50  
51 50

1  
2  
3 51 **Abstract**  
4

5 52 **Introduction:** Despite the widespread acceptance of conventional treatment using  
6  
7 53 composite resin in primary teeth, there is no evidence that this approach is the best  
8  
9  
10 54 option in pediatric clinics. Atraumatic restorative treatment (ART) using high-  
11  
12 55 viscosity glass ionomer cement (GIC) has gradually become more popular because it  
13  
14 56 performs well in clinical studies, is easy to handle and is patient friendly. Therefore,  
15  
16 57 the aim of this randomized clinical trial study is to compare the efficacy of  
17  
18 58 conventional treatment using composite resin with that of ART in posterior primary  
19  
20 59 teeth. As secondary outcomes, cost-efficacy and patient self-reported discomfort will  
21  
22 60 also be tested.  
23

24  
25 61 **Methods and analysis:** Children aged 3 to 6 years presenting with at least one  
26  
27 62 occlusal and/or occlusal-proximal cavity will be randomly assigned to one of two  
28  
29 63 groups according to the dental treatment: ART (experimental group) or composite  
30  
31 64 resin restoration (control group). The dental treatment will be performed at a dental  
32  
33 65 care trailer located in an Educational Complex in Barueri/SP, Brazil. The unit of  
34  
35 66 randomization will be the child. A sample size of 240 teeth with occlusal cavities and  
36  
37 67 188 teeth with occlusal-proximal cavities has been calculated. The primary outcome  
38  
39 68 will be restoration longevity, which will be clinical assessed after 6, 12, 18 and 24  
40  
41 69 months by two examiners. The duration of the dental treatment and the cost of all  
42  
43 70 materials used will be considered when estimating the cost-efficacy of each treatment.  
44  
45 71 Individual discomfort will be measured after each dental procedure using the Facial  
46  
47 72 Scale of Wong-Baker.  
48  
49

50  
51  
52 73 **Ethics and dissemination:** This clinical trial was approved by the Local Ethics  
53  
54 74 Committee from the Faculty of Dentistry of the University of Sao Paulo (registration  
55  
56  
57  
58  
59  
60

1  
2  
3 75 #1.556.018). Participants will be included after their legal guardians have signed an  
4  
5 76 informed consent form containing detailed information about the research.  
6

7 77 **Trial registration:** www.clinicaltrials.gov, NCT02562456. Registered on September  
8  
9 78 25th 2015.  
10

11 79 **Keywords:** restorative dental treatment, primary teeth, composite resin, glass  
12  
13 80 ionomer cement, atraumatic restorative treatment, randomized clinical trial, cost-  
14  
15 81 efficacy analysis  
16  
17  
18  
19

### 20 83 **Strengths and limitations of this study**

- 21 84 • Considering that the success of a restorative treatment is intrinsically related to  
22  
23 85 the handling of the material, it seems necessary to study these techniques  
24  
25 86 under controlled conditions to extract from them the best clinical performance  
26  
27 87 they can offer;  
28  
29 88 • An efficacy study can maximize the likelihood of observing an intervention  
30  
31 89 effect by investigating the benefits and harms of it under highly controlled  
32  
33 90 conditions;  
34  
35 91 • This is the first clinical trial comparing the longevity, cost-efficacy and self-  
36  
37 92 reported discomfort assessment between conventional restoration using  
38  
39 93 composite resin and ART with high-viscosity GIC in posterior primary teeth;  
40  
41 94 • Blinding of operators and patients will not be possible because of the evident  
42  
43 95 differences between the techniques.  
44  
45  
46  
47  
48  
49  
50  
51  
52  
53  
54  
55  
56  
57  
58  
59  
60

## 100 Introduction

101 Restorative care in primary teeth is part of the comprehensive oral health treatment of  
102 children and adolescents,[1] which should guarantee appropriate functional and  
103 aesthetic conditions until tooth exfoliation.[2] There is an ongoing search for ideal  
104 restorative materials for use in pediatric dentistry,[1] but a lack of evidence  
105 persists.[3, 4, 5]

106 Conventional treatment using composite resin is still one of the most common  
107 approaches used in pediatric dental clinics.[6] Despite the aesthetic quality,  
108 preservation of dental structure, and abrasion wear rate similar to that of natural  
109 primary teeth,[6] all composite resins suffer polymerization shrinkage, which can  
110 jeopardize marginal integrity[2] and restoration longevity. Additionally, to take full  
111 advantage of the properties of composite resin, absolute isolation with rubber dam is  
112 necessary,[7] making the restoration not only technique-sensitive and time-  
113 consuming,[2] but also more traumatic for the pediatric patient.[8]

114 An alternative to the use of composite resin is atraumatic restorative treatment  
115 (ART), a minimal intervention approach that simplifies the restorative procedure  
116 through the exclusive use of hand instruments, followed by the application of a  
117 chemical-adhesive material.[9] ART is reported to provoke less anxiety and less pain,  
118 and rarely requires local anesthesia.[10] Currently, the material of choice for ART is  
119 high-viscosity glass ionomer cement (GIC),[11] which provides biocompatibility,  
120 fluoride release, chemical adhesion to the tooth surface[12] and a coefficient of  
121 thermal expansion similar to that of natural teeth.[4] Moreover, it is easy to use  
122 because it can be placed in a single increment.[2]

123 The international scientific literature has already designated ART as an  
124 appropriate procedure to treat occlusal and occlusal-proximal cavities in primary teeth

1  
2  
3 125 when compared with amalgam.[4, 5] However, few clinical studies have compared  
4  
5 126 composite resin performance in primary teeth with any other dental material.[13, 14,  
6  
7 127 15] Moreover, patient-based parameters must also be assessed in order to enable a  
8  
9 128 more effective and appropriate choice of treatment for each individual. In this context,  
10  
11 129 few reports have been found in the literature regarding those outcomes such as  
12  
13 130 patient's acceptability[16, 17] (Novaes et al., 2012; Staman et al., 2013) and cost of  
14  
15 131 restorative treatments.[18,19] (Da Mata et al., 2014; Mickenautsch et al., 2009).

16  
17  
18 132 Because of the need to establish the best scientific evidence about restorative  
19  
20 133 treatment in primary teeth, this study aims to compare the efficacy of two types of  
21  
22 134 treatment in primary molars (ART using high-viscosity GIC and composite resin  
23  
24 135 restoration) using a superiority randomized clinical trial with parallel arms.  
25  
26  
27  
28

### 29 30 137 **Methods/Design**

31  
32 138 The present protocol follows the guidelines of the Standard Protocol Items:  
33  
34 139 Recommendations for Interventional Trials (SPIRIT) as detailed in Attachment A.

35  
36 140 This clinical trial was recorded in the database for registration of clinical  
37  
38 141 studies (Clinicaltrials.gov registration NCT02562456). This study will be a  
39  
40 142 partnership with the city of Barueri, São Paulo, and it is nested to the Caries Detection  
41  
42 143 in Children-2 study (registration NCT02473107). Each participant will be encoded by  
43  
44 144 a number to guarantee information confidentiality. Any files containing identifiable  
45  
46 145 data will be stored in locked filing cabinets, and only researchers will have access to  
47  
48 146 participants' information.

49  
50 147 The final trial dataset will be available for inspection with the coordinator's  
51  
52 148 endorsement. Results will be fully reported in peer-reviewed journals, the patients'  
53  
54 149 newsletter and on the website. If participants develop any dental treatment needs after  
55  
56  
57  
58  
59  
60

1  
2  
3 150 completion of the trial, they will be referred to the health service of the city of  
4  
5 151 Barueri, São Paulo.

6  
7 152

8  
9  
10 153 *Sample description*

11  
12 154 Participants will be selected after screening in a dental care trailer located in  
13  
14 155 the Professor Carlos Osmarinho de Lima Educational Complex (Barueri/SP). All  
15  
16 156 healthy children who live in the city of Barueri seeking dental treatment are potential  
17  
18 157 participants in our project. The trailer is set up as a regular dental office. The  
19  
20 158 inclusion criteria are: 1) children aged 3–6 years; 2) whose parents consent their  
21  
22 159 participation in the research; 3) with at least one occlusal and/or occlusal-proximal  
23  
24 160 cavity in a primary molar; 4) the tooth of interest should not be associated with a  
25  
26 161 fistula, abscess, pulp exposure, history of spontaneous dental pain or mobility; and 5)  
27  
28 162 the cavity of interest should allow the access by the operator using hand instruments.  
29  
30 163 Children who present behavior problems during the clinical examination or during  
31  
32 164 dental treatment will be excluded from our study.

33  
34  
35  
36 165 The child will be set as the unit of randomization, which means that all  
37  
38 166 eligible teeth of a child included in our research will be treated according to the same  
39  
40 167 treatment independently of the number of cavities. For sample calculation, data on the  
41  
42 168 longevity of 2 years of occlusal and occlusal-proximal composite resin  
43  
44 169 restorations[15] were extracted from the literature as 86% and 60%, respectively. A  
45  
46 170 minimum difference of 10% between treatment longevities was set as the superiority  
47  
48 171 limit. Taking the significance level as 5%, a power of 80% and the addition of 40%  
49  
50 172 owing to study design (cluster per children), the minimum number of teeth per group  
51  
52 173 was calculated using a two-tailed test. Additionally, a sample loss of 20% was  
53  
54  
55  
56  
57  
58  
59  
60



174 estimated, resulting in 204 teeth for the occlusal group and 240 teeth for the occlusal-  
 175 proximal group (Table 1).

176

177

Table 1 – Sample distribution.

| Groups                       | Type of cavity |                   |
|------------------------------|----------------|-------------------|
|                              | Occlusal       | Occlusal-proximal |
| Control<br>(Composite resin) | 102            | 120               |
| Experimental<br>(ART)        | 102            | 120               |
| Total                        | 204            | 240               |

178

179 Recruitment will take place from December 2015 to June 2017. Each  
 180 participant will be enrolled in the study for about 25 months: 1 month for the  
 181 Randomized Clinical Trial (RCT) diagnosis and treatment, followed by a 24-month  
 182 observation period. Details are illustrated in Figure 1. Participants' enrolment will be  
 183 facilitated by locating the trailer inside an Educational Complex.

184 After screening, participants who have met the eligibility criteria will have  
 185 their registration data collected and will be clinically examined by one operator.  
 186 Radiographic examination will be performed if any doubts about the pulp  
 187 involvement of the tooth of interest persist. As the child will receive complete dental  
 188 treatment during the study, radiographic examination will also be used if any other  
 189 treatment need demand it.

190 The same operator will also determine the dental caries experience of the child  
 191 which will be assessed based on the World Health Organization (WHO) criteria that  
 192 only considers evident carious cavities, and restored and/or missing teeth as a result of

1  
2  
3 193 carious progression.[20] Thus, the following indices will be calculated for each child:  
4  
5 194 def-t and DMFT; children in whom (def-t) + (DMFT) is lower than or equal to three  
6  
7 195 will be classified as having low dental caries experience. Children with higher scores  
8  
9 196 will be classified as having high dental caries experience.[21]

10  
11  
12 197 The randomization process will be designed in blocks of different sizes  
13  
14 198 generated by software. Opaque, sealed and sequentially numbered envelopes will be  
15  
16 199 used to randomize the participants into the treatment groups.

17  
18 200 The restorative treatment will be performed by four trained and calibrated  
19  
20 201 operators who will disclose which treatment they are performing at the  
21  
22 202 commencement of the restorative procedure. However, blinding participants and  
23  
24 203 operators will not be possible due to the evident differences between both techniques.  
25  
26

27 204

28  
29  
30 205 *Study groups*

31  
32 206 Participants will be randomly assigned into two different groups:

33  
34 207 (a) Group I (control): composite resin restoration, using 37% phosphoric acid, Adper  
35  
36 208 Scotchbond Multipurpose adhesive system (3M/ESPE) and Filtek Z350 resin-  
37  
38 209 composite (3M/ESPE).

39  
40 210 (b) Group II (experimental): ART using high-viscosity GIC Fuji IX (Gold Label – GC  
41  
42 211 Corp) with manual dosage and hand-mixed powder and liquid.  
43  
44

45 212

46  
47 213 *Treatment protocol*

48  
49 214

50  
51 215 (a) Composite resin restoration

52  
53 216  
54  
55  
56  
57  
58  
59  
60

1  
2  
3 217 All children from Group I will be treated according to conventional techniques  
4  
5 218 using composite resin:

- 6  
7 219 • Use local anesthesia;  
8  
9  
10 220 • Maintain absolute isolation of the operatory field with rubber dam and clamp;  
11  
12 221 • Remove caries: use hand excavators to remove caries in dentin. Both infected  
13  
14 222 and affected dentin should be removed from the dentin–enamel junction,  
15  
16 223 maintaining the affected dentin in the remaining dental walls. If necessary,  
17  
18 224 round bur at high speed under water cooling will be used to remove the  
19  
20 225 unsupported enamel;  
21  
22 226 • Etch enamel for 15 s and dentin for 7 s using 37% phosphoric acid, followed  
23  
24 227 by rinsing for the same amount of time and drying with compressed air;  
25  
26 228 • Apply the Adper Scotchbond Multipurpose adhesive system (3M/ESPE)  
27  
28 229 according to the manufacturer’s guidelines: primer application followed by  
29  
30 230 gentle drying for 5 s; then polymerization of the adhesive for 10 s with the XL  
31  
32 231 3000 curing light (3M/ESPE);  
33  
34 232 • Apply light-cured Filtek Z350 resin (3M/ESPE) using the oblique incremental  
35  
36 233 placement technique. Each increment should be polymerized for 20 s. In  
37  
38 234 occlusal-proximal cavities, an adapted matrix strip should be used with a  
39  
40 235 wooden wedge to maintain it in place, providing appropriate contour to the  
41  
42 236 restoration;  
43  
44 237 • Remove the rubber dam and check the occlusion with articulating paper. If  
45  
46 238 necessary, finishing burs (F and FF) should be used under a cooling spray.  
47  
48  
49  
50  
51  
52  
53

54 240 (b) Atraumatic restorative treatment (ART) using glass ionomer cement (GIC)

55  
56  
57 241  
58  
59  
60

1  
2  
3 242 All children from Group II will be treated according to the ART philosophy as  
4  
5 243 described by Frencken:[22]

- 6  
7 244
- Maintain relative isolation of the operatory field with cotton rolls;
- 8  
9 245
- Remove caries: using only hand excavators compatible with the size of the
- 10  
11 246 carious cavity. Both infected and affected dentin should be removed from the
- 12  
13 247 dentin–enamel junction. Thus, as described for Group I, the affected dentin
- 14  
15 248 will be maintained in the remaining walls;
- 16  
17 249
- Clean the cavity: cavity walls should be cleaned with cotton balls moistened
- 18  
19 250 with water;
- 20  
21 251
- Condition the dentin: apply a drop of 11.5% polyacrylic acid on a cotton ball
- 22  
23 252 for 15 s. Then, wash the cavity with three cotton balls moistened with water
- 24  
25 253 and dry using three more cotton balls;
- 26  
27 254
- Use correct dosage (one spoon measure of the powder to one drop of
- 28  
29 255 polyacrylic acid): place the polyacrylic acid flask vertically and upside down,
- 30  
31 256 wait a few seconds until the bubbles rise and then drip two drops. Use the first
- 32  
33 257 drop to condition the cavity, because this initial drop may contain bubbles;
- 34  
35 258
- Hand mix: spread the second drop of polyacrylic acid over the paper pad.
- 36  
37 259 Then, mix the powder in with the acid in two stages—manipulate the first part
- 38  
39 260 for 10 s and the second part for 15–20 s, applying moderate pressure. Use the
- 40  
41 261 material only while it remains glossy;
- 42  
43 262
- Apply GIC: insert the GIC with a #1 spatula followed by finger pressure using
- 44  
45 263 petroleum jelly. For occlusal-proximal cavities, use an adapted matrix strip
- 46  
47 264 with a wooden wedge to maintain it in place, providing appropriate contour to
- 48  
49 265 the restoration. Protecting the restoration with petroleum jelly is necessary to
- 50  
51 266 inhibit syneresis and imbibition;
- 52  
53  
54  
55  
56  
57  
58  
59  
60

- 1  
2  
3 267 • Check the occlusion: after the initial set (approximately 5 min), check the  
4  
5 268 occlusion with articulating paper. If necessary, sharp hand instruments should  
6  
7 269 be used for adjustments. A new layer of petroleum jelly should be applied to  
8  
9  
10 270 the surface of the restoration;  
11  
12 271 • Instruct the patient not to eat solid food for 1 h.

14 272 Dental care other than restorative treatment related to this project will also be  
15  
16 273 provided in the dental care trailer by three operators trained in the same philosophy  
17  
18 274 regarding non-cavitated carious lesions[23] and pulp treatment[24]. Moreover, all  
19  
20 275 participants and their respective legal guardians will receive verbal instructions about  
21  
22 276 the use of toothpaste with a minimum concentration of 1000 ppm fluoride to prevent  
23  
24 277 dental caries.[25]

27 278 The risks related to the present research are similar to those found during  
28  
29 279 conventional clinical dental treatment. Thus, there is no Data Monitoring Committee.  
30  
31 280 Independent surveillance of trial data collection, management and analysis will be  
32  
33 281 undertaken by the principal investigator who has overall responsibility for the study  
34  
35 282 and is in charge of the data.

36  
37  
38 283

#### 39 40 284 *Outcomes*

41  
42 285

43  
44 286 The primary outcome will be the longevity of both restorative treatments after  
45  
46 287 follow-up for 2 years. Secondary outcomes will include the cost-efficacy of both  
47  
48 288 types of restorative treatment and self-reported discomfort.

49  
50 289

#### 51 52 290 (I) Longevity

1  
2  
3 291 Treatment longevity will be evaluated after 6, 12, 18 and 24 months by two  
4  
5 292 trained examiners. The intra-examiner and inter-examiner concordances will be  
6  
7 293 calculated using Cohen's Kappa test. Only scores above 0.7 will be accepted. After  
8  
9  
10 294 prophylaxis, the occlusal restorations will be clinically evaluated according to the  
11  
12 295 Frencken and Holmgren[26] criteria (Attachment B).

14 296 For occlusal-proximal restorations, the adopted criteria are those proposed by  
15  
16 297 Roeleveld et al.[27] (Attachment C). The width and depth of marginal defects, the  
17  
18 298 surface wear and the excess or lack of material will be measured using the WHO CPI  
19  
20  
21 299 periodontal probe, which has a ball-shaped tip 0.5 mm in diameter.

23 300 If any treatment need is noted at the return visits, the procedure will be  
24  
25 301 performed by one of the three trained operators until the case is resolved. Oral  
26  
27 302 hygiene and fluoride use instructions will be repeated at each return visit for all  
28  
29  
30 303 children.

32 304 Data from each participant will be registered in clinical records for future  
33  
34 305 statistical analysis. Data quality will be ensured by validation checks that include  
35  
36 306 missing data, out of range values, and illogical and invalid responses. All data entered  
37  
38 307 will be audited by the coordinator, and data queries will be raised as necessary.

40  
41 308

#### 43 309 (II) Cost-efficacy

45 310 The direct cost analysis will be based on previous publications[28, 29]  
46  
47 311 adjusted to the Brazilian reality[30]. Both the professional cost and the procedure cost  
48  
49  
50 312 will be considered.

52 313 To calculate the professional cost, we will use the previous calculation of  
53  
54 314 Floriano et al.[31], such that the time spent in each session will be converted to hours  
55  
56 315 and multiplied by the average income of a dentist per hour (\$13.89) and a dental

1  
2  
3 316 assistant per hour (\$7.06) as ruled by the Brazilian federal law n° 3999/61.[30, 31] To  
4  
5 317 estimate the procedure cost, we will consider both the variable cost, which includes  
6  
7 318 electricity and the depreciation of instruments and equipment, and the materials  
8  
9  
10 319 cost.[28, 32] To calculate the instruments and equipment depreciation (peripherals  
11  
12 320 and dental chair), we will use the previous calculation of Da Mata et al.[18] and  
13  
14 321 Floriano et al.[29] that considers their cost, a lifespan of 3 years for instruments[18]  
15  
16 322 and 5 years for equipment[30] and a monthly use of 160 h.

17  
18 323 A researcher other than the operator will time each restorative treatment  
19  
20 324 session, including the return visits, and will register in predetermined sheets the  
21  
22 325 specifications and quantity of all materials used. Prices will be inferred from the  
23  
24 326 market value converted to US dollars and obtained by averaging the values from  
25  
26 327 different places that have commercialized the products used. The prices will also be  
27  
28 328 updated during the course of the study.

29  
30 329 In order to estimate the cost-efficacy, the incremental cost-efficacy ration  
31  
32 330 (ICER) will be estimated by dividing the average total cost by the survival after 2  
33  
34 331 years of each treatment:

$$332 \quad \text{ICER} = (\text{cost}_{\text{ART}} - \text{efficacy}_{\text{ART}}) / (\text{cost}_{\text{TC}} - \text{efficacy}_{\text{TC}})$$

333  
334 (III) Child self-reported discomfort

335 The self-reported discomfort of each child will be evaluated using the Wong-  
336 Baker Facial Scale.[33] This scale indicates the discomfort of an individual who has  
337 to choose among six faces, each one expressing different facial expressions. The first  
338 image is a smiling happy face, followed by gradually less cheerful expressions up to  
339 the last one, which is a very sad face covered in tears. The scale will be applied  
340 immediately after each restorative treatment session by the operator who is timing the  
341 procedure.

1  
2  
3 342 The participant will be asked to choose the face that best match how he or she  
4  
5 343 felt during the treatment. This answer should be given solely by the child, with no  
6  
7 344 parental or professional interference.[34]  
8

9 345

10  
11 346 *Data analysis*

12  
13  
14 347 To compare the longevity of the restorations, both Kaplan–Meier survival  
15  
16 348 analysis and Cox regression with shared frailty will be applied. The association  
17  
18 349 between restoration longevity and caries experience or the type of cavity will also be  
19  
20 350 evaluated using Cox’s Regression with shared frailty. To determine the data  
21  
22 351 normality, the Kolmogorov–Smirnov test will be used. In relation to the secondary  
23  
24 352 outcomes, the comparison between groups in relation to the time spent in each  
25  
26 353 procedure as well as the average cost of a restoration will be done through the use of  
27  
28 354 linear regression adjusted to the cluster effect. Multilevel Poisson regression will be  
29  
30 355 used to compare both groups and the other independent variables to the self-reported  
31  
32 356 discomfort. The significance level will be adjusted to 5%.

33  
34  
35  
36 357

37  
38 358 **Ethics and dissemination**

39  
40 359 This clinical trial was approved by the Ethics Committee of Research in  
41  
42 360 Humans from the Faculty of Dentistry of the University of Sao Paulo (registration  
43  
44 361 #1.556.018). Participants will be included after their parents or legal guardians have  
45  
46 362 signed an informed consent form containing detailed information about the research.

47  
48  
49 363 This study will involve the publication of grouped data collected from  
50  
51 364 participants’ individual information. This statement will be described in the consent  
52  
53 365 form of each participant.

54  
55  
56 366  
57  
58  
59  
60



1  
2  
3 367 **Funding**  
4

5 368 This work was supported by Fundação de Amparo à Pesquisa do Estado de São Paulo  
6  
7 369 (FAPESP) grants number 2015/11356-6 and 2012/50716-0.  
8

9  
10 370

11 371 **Authors' contributions**

12 372 DPR, MMB, FMM and IF contributed to the conception of this trial. DPR was  
13  
14 373 responsible for its design. DPR is the trial coordinator and NML is the principal  
15  
16 374 investigator. DPR, NML and IO drafted the protocol. IF is in charge of the  
17  
18 375 recruitment of participants. NML is responsible for the patients' treatment. CSS and  
19  
20 376 LY are responsible for timekeeping, recording materials and organizing treatment.  
21  
22 377 TKT is responsible for patient evaluations over time. All authors critically reviewed  
23  
24 378 and approved the final manuscript as submitted.  
25  
26  
27  
28  
29

30 379

31 380 **Competing interests**

32 381 We declare that there are no conflicts of interest regarding the performance of this  
33  
34 382 trial.  
35  
36  
37

38 383

39 384 **Acknowledgments**

40 385 The authors would like to thank the Fundação de Amparo à Pesquisa do Estado de  
41  
42 386 São Paulo – FAPESP (Grants #2015/11356-6 and #2012/50716-0) for funding this  
43  
44 387 trial, and all undergraduate and postgraduate students involved in the dental care  
45  
46 388 trailer project. Finally, we acknowledge all participants in the postgraduate Pediatric  
47  
48 389 Dentistry Seminar of FOUSP for the constructive criticism they provided.  
49  
50  
51

52 390

53 391 **References**  
54  
55  
56  
57  
58  
59  
60

- 1  
2  
3 392 1. Dhar V, Hsu KL, Coll JA, Ginsberg E, Ball BM et al. Evidence-based update  
4  
5 393 of pediatric dental restoration procedures: dental materials. *Journal of Clinical*  
6  
7 394 *Pediatric Dentistry* 2015; 39(4): 303-10.
- 8  
9 395 2. Casagrande L, Dalpian DM, Ardenghi TM, Zanatta FB, Balbinot CEA et al.  
10  
11 396 Randomized clinical trial of adhesive restorations in primary molars. 18-  
12  
13 397 month results. *American Journal of Dentistry* 2013; 26 (6): 351-55.
- 14  
15 398 3. Yengopal V, Harnekar SY, Patel N, Siegfried N. Dental filling for the  
16  
17 399 treatment of caries in the primary dentition. *Cochrane Database of Systematic*  
18  
19 400 *Reviews*. 2009; doi: 10.1002/14651858.
- 20  
21 401 4. Mickenautsch S, Yengopal V, Banerjee A. Atraumatic restorative treatment  
22  
23 402 versus amalgam restoration longevity: A systematic review. *Clinical Oral*  
24  
25 403 *Investigations* 2010; 14: 233-240.
- 26  
27 404 5. Raggio DP, Hesse D, Lenzi TL, Guglielmi CAB, Braga MM. Is atraumatic  
28  
29 405 restorative treatment an option for restoring occlusoproximal caries lesions in  
30  
31 406 primary teeth? A systematic review and meta-analysis. *International Journal of*  
32  
33 407 *Paediatric Dentistry* 2012; 23: 435-43.
- 34  
35 408 6. Qvist V, Poulsen A, Teglers PT, Mjör IA. The longevity of different  
36  
37 409 restorations in primary teeth. *International Journal of Paediatric Dentistry*  
38  
39 410 2010; 20: 1–7.
- 40  
41 411 7. Heintze SD, Rousson V. Clinical effectiveness of direct Class II restoration: a  
42  
43 412 meta-analysis. *The Journal of Adhesive Dentistry* 2012; 14(5): 407-31.
- 44  
45 413 8. Schriks MC, van Amerongen WE. Atraumatic perspectives of ART:  
46  
47 414 psychological and physiological aspects of treatment with and without rotary  
48  
49 415 instruments. *Community Dentistry and Oral Epidemiology* 2003; 31: 15–20.
- 50  
51 416 9. Frencken JE, Pilot T, Songpaisan Y, Phantumvait P. Atraumatic restorative  
52  
53  
54  
55  
56  
57  
58  
59  
60

- 1  
2  
3 417 treatment (ART): Rationale, technique, and development. *Journal of Public*  
4  
5 418 *Health Dentistry*. 1996; 56(3): 135-140.  
6  
7 419 10. Frencken JE. The State-of-Art of ART restorations. *Dental Update* 2014;  
8  
9 420 41(3):218-20.  
10  
11 421 11. van't Hof MA, Frencken JE, Van Palenstein Helderma WH, Holmgren WH.  
12  
13 422 The atraumatic restorative treatment (ART) approach for managing dental  
14  
15 423 caries: a meta-analysis. *International Dental Journal* 2006; 56(6): 345-51.  
16  
17 424 12. van Dijken JWV, Pallesen U. Long-term dentin retention of etch-and-rinse  
18  
19 425 and self-etch adhesives and a resin-modified glass ionomer cement in non-  
20  
21 426 carious cervical lesion. *Dental Materials* 2008; 24: 915–22.  
22  
23 427 13. Fuks AB, Araujo FB, Osorio LB, Hadami PE, Pinto AS. Clinical and  
24  
25 428 radiographic assessment of class II esthetic restorations in primary molars.  
26  
27 429 *Journal of Pediatric Dentistry* 2000; 22(5): 479-85.  
28  
29 430 14. Ersin NK, Candan U, Aykut A, Oncag O, Eronat C, Kose T. A clinical  
30  
31 431 evaluation of resin-based composite and glass-ionomer cement restorations  
32  
33 432 placed in primary teeth using the ART approach. *Journal of the American*  
34  
35 433 *Dental Association* 2006; 137: 1529-36.  
36  
37 434 15. Alves dos Santos MP, Luiz RR, Maia LC. Randomized trial of resin-based  
38  
39 435 restorations in class I and class II beveled preparations in primary molars: 48-  
40  
41 436 month results. *Journal of Dentistry*. 2010; 38(6): 451-59.  
42  
43 437 16. Novaes TF, Matos R, Raggio DP, Braga MM, Mendes FM. Children's  
44  
45 438 discomfort in assessments using different methods for approximal caries  
46  
47 439 detection. *Braz. Oral Res.* 2012; 26(2): 93-99.  
48  
49 440 17. Staman NM, Townsend JA, Hagan JL. Observational study: discomfort  
50  
51 441 following dental procedures for children. *Pediatr. Dent.* 2013; 35(1): 52-4.  
52  
53  
54  
55  
56  
57  
58  
59  
60

- 1  
2  
3 442 18. Da Mata C, Allen PF, Cronin M, O'Mahony D, McKenna G, Woods N.  
4  
5 443 Cost-effectiveness of ART restorations in elderly adults: a randomized clinical  
6  
7 444 trial. *Community Dentistry and Oral Epidemiology* 2014; 42: 79-87.  
8  
9  
10 445 19. Mickenautsch S, Munshi I, Grossman ES. Comparative cost of Art and  
11  
12 446 conventional treatment within a dental school clinic. *Journal of Minimum*  
13  
14 447 *Intervention in Dentistry*. 2009; 2(2): 135-145.  
15  
16 448 20. WHO (World Health Organization). *Oral health surveys: basic methods*. 3ed.  
17  
18 449 Geneva: World Health Organization; 1997. (20)  
19  
20  
21 450 21. Brasil. Ministério da Saúde (MS). *Projeto SB Brasil 2010: condições de saúde*  
22  
23 451 *bucal da população brasileira 2009-2010. Resultados principais*. Brasília:  
24  
25 452 2012.  
26  
27 453 22. Frencken JE. Survival of single surface ART-restorations in Zimbabwe after 3  
28  
29 454 years. *Nederlands Tijdschrift voor Tandheelkunde* 1999; 106(6): 214-8.  
30  
31  
32 455 23. Gibson G, Jurasic MM, Wehler CJ, Jones JA. Supplemental fluoride use for  
33  
34 456 moderate and high caries risk adults: a systematic review. *Journal of Public*  
35  
36 457 *Health Dentistry* 2011;71(3):171-84.  
37  
38 458 24. Cerqueira DF, Mello-Moura AC, Santos EM, Guedes-Pinto AC. Cytotoxicity,  
39  
40 459 histopathological, microbiological and clinical aspects of an endodontic  
41  
42 460 iodoform-based paste used in pediatric dentistry: a review. *Journal of Clinical*  
43  
44 461 *Pediatric Dentistry* 2008;32(2):105-10.  
45  
46  
47 462 25. Walsh T, Worthington HV, Glenny AM, Appelbe P, Marinho VC, Shi X.  
48  
49 463 Fluoride toothpastes of different concentrations for preventing dental caries in  
50  
51 464 children and adolescents. *Cochrane Database Systematic Review* 2010; 20(1):  
52  
53 465 1-221  
54  
55  
56 466 26. Frencken JE, Holmgren CF. Tratamento restaurador atraumático (ART) para a  
57  
58  
59  
60

- 1  
2  
3 467 cárie dentária. São Paulo: Santos. 2001.
- 4  
5 468 27. Roeleveld AC, Van Amerongen WE, Mandari GJ. Influence of residual caries  
6  
7 469 and cervical gaps on the survival rate of Class II glass ionomer restorations.  
8  
9 470 European Archives of Paediatric Dentistry 2006; 7(2): 85-91.
- 10  
11 471 28. Takanashi Y, Penrod JR, Lund JP, Feine JS. A cost comparison of mandibular  
12  
13 472 two-implant overdenture and conventional denture treatment. International  
14  
15 473 Journal of Prosthodontics 2004; 17: 181-86
- 16  
17 474 29. Oscarson N, Kallestal C, Fjelddahl A, Lindholm L. Cost effectiveness of  
18  
19 475 different caries preventive measures in a high-risk population of Swedish  
20  
21 476 adolescents. Community Dentistry and Oral Epidemiology 2003; 31(3): 169-  
22  
23 477 178.
- 24  
25 478 30. Floriano I, Gimenez R, Reyes A, Matos R, Mattos-Silveira, J, Mendes FM.;  
26  
27 479 Braga MM. Análise de custos de diferentes abordagens para avaliação de  
28  
29 480 lesões de cárie em dentes decíduos. Brazilian Oral Research. 2013; 27(1): 41-  
30  
31 481 9.
- 32  
33 482 31. Morita MC, Haddad AE, Araújo ME. Perfil atual e tendências do cirurgião-  
34  
35 483 dentista brasileiro. Maringá: Dental Press Internacional. 2010.
- 36  
37 484 32. Kawai Y, Murakami H, Takanashi Y, Lund JP, Feine JS. Efficient resource  
38  
39 485 use in simplified complete denture fabrication. Journal of Prosthodontics  
40  
41 486 2010; 19: 512-16.
- 42  
43 487 33. Wong DL, Baker CM. Pain in children: comparison of assessment scales.  
44  
45 488 Pediatric Nursing. 1988; 14(1): 9-17.
- 46  
47 489 34. Novaes TF, Matos R, Raggio DP, Imperato JC, Braga MM, Mendes FM.  
48  
49 490 Influence of the discomfort reported by children on the performance of  
50  
51 491 approximal caries detection methods. Caries Research. 2010; 44(5): 465-71.  
52  
53  
54  
55  
56  
57  
58  
59  
60

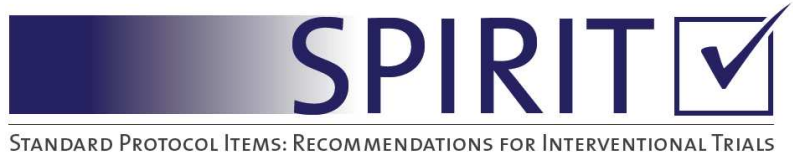

1  
2  
3  
4  
5  
6  
7  
8  
9  
10  
11  
12  
13  
14  
15  
16  
17  
18  
19  
20  
21  
22  
23  
24  
25  
26  
27  
28  
29  
30  
31  
32  
33  
34  
35  
36  
37  
38  
39  
40  
41  
42  
43  
44  
45  
46  
47  
48  
49

SPIRIT 2013 Checklist: Recommended items to address in a clinical trial protocol and related documents\*

| Section/item                      | Item No | Description                                                                                                                                                                                                                                                                              | Addressed on page number |
|-----------------------------------|---------|------------------------------------------------------------------------------------------------------------------------------------------------------------------------------------------------------------------------------------------------------------------------------------------|--------------------------|
| <b>Administrative information</b> |         |                                                                                                                                                                                                                                                                                          |                          |
| Title                             | 1       | Descriptive title identifying the study design, population, interventions, and, if applicable, trial acronym                                                                                                                                                                             | 01                       |
| Trial registration                | 2a      | Trial identifier and registry name. If not yet registered, name of intended registry                                                                                                                                                                                                     | 04                       |
|                                   | 2b      | All items from the World Health Organization Trial Registration Data Set                                                                                                                                                                                                                 | _____                    |
| Protocol version                  | 3       | Date and version identifier                                                                                                                                                                                                                                                              | 04                       |
| Funding                           | 4       | Sources and types of financial, material, and other support                                                                                                                                                                                                                              | 15                       |
| Roles and responsibilities        | 5a      | Names, affiliations, and roles of protocol contributors                                                                                                                                                                                                                                  | 01, 02                   |
|                                   | 5b      | Name and contact information for the trial sponsor                                                                                                                                                                                                                                       | 02                       |
|                                   | 5c      | Role of study sponsor and funders, if any, in study design; collection, management, analysis, and interpretation of data; writing of the report; and the decision to submit the report for publication, including whether they will have ultimate authority over any of these activities | 16                       |
|                                   | 5d      | Composition, roles, and responsibilities of the coordinating centre, steering committee, endpoint adjudication committee, data management team, and other individuals or groups overseeing the trial, if applicable (see Item 21a for data monitoring committee)                         | _____                    |

1  
2  
3 **Introduction**  
4

|                            |    |                                                                                                                                                                                                           |    |
|----------------------------|----|-----------------------------------------------------------------------------------------------------------------------------------------------------------------------------------------------------------|----|
| 5 Background and rationale | 6a | Description of research question and justification for undertaking the trial, including summary of relevant studies (published and unpublished) examining benefits and harms for each intervention        | 05 |
|                            | 6b | Explanation for choice of comparators                                                                                                                                                                     | 05 |
| 10 Objectives              | 7  | Specific objectives or hypotheses                                                                                                                                                                         | 06 |
| 12 Trial design            | 8  | Description of trial design including type of trial (eg, parallel group, crossover, factorial, single group), allocation ratio, and framework (eg, superiority, equivalence, noninferiority, exploratory) | 06 |

15  
16 **Methods: Participants, interventions, and outcomes**  
17

|                         |     |                                                                                                                                                                                                                                                                                                                                                                                |                |
|-------------------------|-----|--------------------------------------------------------------------------------------------------------------------------------------------------------------------------------------------------------------------------------------------------------------------------------------------------------------------------------------------------------------------------------|----------------|
| 18 Study setting        | 9   | Description of study settings (eg, community clinic, academic hospital) and list of countries where data will be collected. Reference to where list of study sites can be obtained                                                                                                                                                                                             | 07             |
| 21 Eligibility criteria | 10  | Inclusion and exclusion criteria for participants. If applicable, eligibility criteria for study centres and individuals who will perform the interventions (eg, surgeons, psychotherapists)                                                                                                                                                                                   | 07             |
| 24 Interventions        | 11a | Interventions for each group with sufficient detail to allow replication, including how and when they will be administered                                                                                                                                                                                                                                                     | 09, 10, 11, 12 |
|                         | 11b | Criteria for discontinuing or modifying allocated interventions for a given trial participant (eg, drug dose change in response to harms, participant request, or improving/worsening disease)                                                                                                                                                                                 | _____          |
|                         | 11c | Strategies to improve adherence to intervention protocols, and any procedures for monitoring adherence (eg, drug tablet return, laboratory tests)                                                                                                                                                                                                                              | _____          |
|                         | 11d | Relevant concomitant care and interventions that are permitted or prohibited during the trial                                                                                                                                                                                                                                                                                  | _____          |
| 35 Outcomes             | 12  | Primary, secondary, and other outcomes, including the specific measurement variable (eg, systolic blood pressure), analysis metric (eg, change from baseline, final value, time to event), method of aggregation (eg, median, proportion), and time point for each outcome. Explanation of the clinical relevance of chosen efficacy and harm outcomes is strongly recommended | 12, 13, 14     |
| 41 Participant timeline | 13  | Time schedule of enrolment, interventions (including any run-ins and washouts), assessments, and visits for participants. A schematic diagram is highly recommended (see Figure)                                                                                                                                                                                               | 08             |

1  
2  
3  
4  
5  
6  
7  
8  
9  
10  
11  
12  
13  
14  
15  
16  
17  
18  
19  
20  
21  
22  
23  
24  
25  
26  
27  
28  
29  
30  
31  
32  
33  
34  
35  
36  
37  
38  
39  
40  
41  
42  
43  
44  
45  
46  
47  
48  
49

|             |    |                                                                                                                                                                                       |    |
|-------------|----|---------------------------------------------------------------------------------------------------------------------------------------------------------------------------------------|----|
| Sample size | 14 | Estimated number of participants needed to achieve study objectives and how it was determined, including clinical and statistical assumptions supporting any sample size calculations | 07 |
| Recruitment | 15 | Strategies for achieving adequate participant enrolment to reach target sample size                                                                                                   | 08 |

**Methods: Assignment of interventions (for controlled trials)**

Allocation:

|                                  |     |                                                                                                                                                                                                                                                                                                                                                          |         |
|----------------------------------|-----|----------------------------------------------------------------------------------------------------------------------------------------------------------------------------------------------------------------------------------------------------------------------------------------------------------------------------------------------------------|---------|
| Sequence generation              | 16a | Method of generating the allocation sequence (eg, computer-generated random numbers), and list of any factors for stratification. To reduce predictability of a random sequence, details of any planned restriction (eg, blocking) should be provided in a separate document that is unavailable to those who enrol participants or assign interventions | 09      |
| Allocation concealment mechanism | 16b | Mechanism of implementing the allocation sequence (eg, central telephone; sequentially numbered, opaque, sealed envelopes), describing any steps to conceal the sequence until interventions are assigned                                                                                                                                                | 09      |
| Implementation                   | 16c | Who will generate the allocation sequence, who will enrol participants, and who will assign participants to interventions                                                                                                                                                                                                                                | 08 e 09 |
| Blinding (masking)               | 17a | Who will be blinded after assignment to interventions (eg, trial participants, care providers, outcome assessors, data analysts), and how                                                                                                                                                                                                                | 09      |
|                                  | 17b | If blinded, circumstances under which unblinding is permissible, and procedure for revealing a participant's allocated intervention during the trial                                                                                                                                                                                                     | _____   |

**Methods: Data collection, management, and analysis**

|                         |     |                                                                                                                                                                                                                                                                                                                                                                                                              |       |
|-------------------------|-----|--------------------------------------------------------------------------------------------------------------------------------------------------------------------------------------------------------------------------------------------------------------------------------------------------------------------------------------------------------------------------------------------------------------|-------|
| Data collection methods | 18a | Plans for assessment and collection of outcome, baseline, and other trial data, including any related processes to promote data quality (eg, duplicate measurements, training of assessors) and a description of study instruments (eg, questionnaires, laboratory tests) along with their reliability and validity, if known. Reference to where data collection forms can be found, if not in the protocol | 12    |
|                         | 18b | Plans to promote participant retention and complete follow-up, including list of any outcome data to be collected for participants who discontinue or deviate from intervention protocols                                                                                                                                                                                                                    | _____ |



|    |                                 |     |                                                                                                                                                                                                                                                                                                                                       |        |
|----|---------------------------------|-----|---------------------------------------------------------------------------------------------------------------------------------------------------------------------------------------------------------------------------------------------------------------------------------------------------------------------------------------|--------|
| 1  |                                 |     |                                                                                                                                                                                                                                                                                                                                       |        |
| 2  |                                 |     |                                                                                                                                                                                                                                                                                                                                       |        |
| 3  | Data management                 | 19  | Plans for data entry, coding, security, and storage, including any related processes to promote data quality (eg, double data entry; range checks for data values). Reference to where details of data management procedures can be found, if not in the protocol                                                                     | 06     |
| 4  |                                 |     |                                                                                                                                                                                                                                                                                                                                       |        |
| 5  |                                 |     |                                                                                                                                                                                                                                                                                                                                       |        |
| 6  |                                 |     |                                                                                                                                                                                                                                                                                                                                       |        |
| 7  | Statistical methods             | 20a | Statistical methods for analysing primary and secondary outcomes. Reference to where other details of the statistical analysis plan can be found, if not in the protocol                                                                                                                                                              | 15     |
| 8  |                                 |     |                                                                                                                                                                                                                                                                                                                                       |        |
| 9  |                                 |     |                                                                                                                                                                                                                                                                                                                                       |        |
| 10 |                                 | 20b | Methods for any additional analyses (eg, subgroup and adjusted analyses)                                                                                                                                                                                                                                                              | 15     |
| 11 |                                 |     |                                                                                                                                                                                                                                                                                                                                       |        |
| 12 |                                 | 20c | Definition of analysis population relating to protocol non-adherence (eg, as randomised analysis), and any statistical methods to handle missing data (eg, multiple imputation)                                                                                                                                                       |        |
| 13 |                                 |     |                                                                                                                                                                                                                                                                                                                                       |        |
| 14 |                                 |     |                                                                                                                                                                                                                                                                                                                                       |        |
| 15 |                                 |     |                                                                                                                                                                                                                                                                                                                                       |        |
| 16 | <b>Methods: Monitoring</b>      |     |                                                                                                                                                                                                                                                                                                                                       |        |
| 17 |                                 |     |                                                                                                                                                                                                                                                                                                                                       |        |
| 18 | Data monitoring                 | 21a | Composition of data monitoring committee (DMC); summary of its role and reporting structure; statement of whether it is independent from the sponsor and competing interests; and reference to where further details about its charter can be found, if not in the protocol. Alternatively, an explanation of why a DMC is not needed | 12     |
| 19 |                                 |     |                                                                                                                                                                                                                                                                                                                                       |        |
| 20 |                                 |     |                                                                                                                                                                                                                                                                                                                                       |        |
| 21 |                                 |     |                                                                                                                                                                                                                                                                                                                                       |        |
| 22 |                                 |     |                                                                                                                                                                                                                                                                                                                                       |        |
| 23 |                                 | 21b | Description of any interim analyses and stopping guidelines, including who will have access to these interim results and make the final decision to terminate the trial                                                                                                                                                               |        |
| 24 |                                 |     |                                                                                                                                                                                                                                                                                                                                       |        |
| 25 |                                 |     |                                                                                                                                                                                                                                                                                                                                       |        |
| 26 | Harms                           | 22  | Plans for collecting, assessing, reporting, and managing solicited and spontaneously reported adverse events and other unintended effects of trial interventions or trial conduct                                                                                                                                                     | 06, 12 |
| 27 |                                 |     |                                                                                                                                                                                                                                                                                                                                       |        |
| 28 |                                 |     |                                                                                                                                                                                                                                                                                                                                       |        |
| 29 | Auditing                        | 23  | Frequency and procedures for auditing trial conduct, if any, and whether the process will be independent from investigators and the sponsor                                                                                                                                                                                           | 12     |
| 30 |                                 |     |                                                                                                                                                                                                                                                                                                                                       |        |
| 31 |                                 |     |                                                                                                                                                                                                                                                                                                                                       |        |
| 32 |                                 |     |                                                                                                                                                                                                                                                                                                                                       |        |
| 33 | <b>Ethics and dissemination</b> |     |                                                                                                                                                                                                                                                                                                                                       |        |
| 34 |                                 |     |                                                                                                                                                                                                                                                                                                                                       |        |
| 35 | Research ethics approval        | 24  | Plans for seeking research ethics committee/institutional review board (REC/IRB) approval                                                                                                                                                                                                                                             | 15     |
| 36 |                                 |     |                                                                                                                                                                                                                                                                                                                                       |        |
| 37 |                                 |     |                                                                                                                                                                                                                                                                                                                                       |        |
| 38 | Protocol amendments             | 25  | Plans for communicating important protocol modifications (eg, changes to eligibility criteria, outcomes, analyses) to relevant parties (eg, investigators, REC/IRBs, trial participants, trial registries, journals, regulators)                                                                                                      |        |
| 39 |                                 |     |                                                                                                                                                                                                                                                                                                                                       |        |
| 40 |                                 |     |                                                                                                                                                                                                                                                                                                                                       |        |
| 41 |                                 |     |                                                                                                                                                                                                                                                                                                                                       |        |
| 42 |                                 |     |                                                                                                                                                                                                                                                                                                                                       |        |
| 43 |                                 |     |                                                                                                                                                                                                                                                                                                                                       |        |
| 44 |                                 |     |                                                                                                                                                                                                                                                                                                                                       |        |
| 45 |                                 |     |                                                                                                                                                                                                                                                                                                                                       |        |
| 46 |                                 |     |                                                                                                                                                                                                                                                                                                                                       |        |
| 47 |                                 |     |                                                                                                                                                                                                                                                                                                                                       |        |
| 48 |                                 |     |                                                                                                                                                                                                                                                                                                                                       |        |
| 49 |                                 |     |                                                                                                                                                                                                                                                                                                                                       |        |

1  
2  
3  
4  
5  
6  
7  
8  
9  
10  
11  
12  
13  
14  
15  
16  
17  
18  
19  
20  
21  
22  
23  
24  
25  
26  
27  
28  
29  
30  
31  
32  
33  
34  
35  
36  
37  
38  
39  
40  
41  
42  
43  
44  
45  
46  
47  
48  
49

|                               |     |                                                                                                                                                                                                                                                                                     |        |
|-------------------------------|-----|-------------------------------------------------------------------------------------------------------------------------------------------------------------------------------------------------------------------------------------------------------------------------------------|--------|
| Consent or assent             | 26a | Who will obtain informed consent or assent from potential trial participants or authorised surrogates, and how (see Item 32)                                                                                                                                                        | 07, 15 |
|                               | 26b | Additional consent provisions for collection and use of participant data and biological specimens in ancillary studies, if applicable                                                                                                                                               | _____  |
| Confidentiality               | 27  | How personal information about potential and enrolled participants will be collected, shared, and maintained in order to protect confidentiality before, during, and after the trial                                                                                                | 06     |
| Declaration of interests      | 28  | Financial and other competing interests for principal investigators for the overall trial and each study site                                                                                                                                                                       | 16     |
| Access to data                | 29  | Statement of who will have access to the final trial dataset, and disclosure of contractual agreements that limit such access for investigators                                                                                                                                     | 06     |
| Ancillary and post-trial care | 30  | Provisions, if any, for ancillary and post-trial care, and for compensation to those who suffer harm from trial participation                                                                                                                                                       | 06     |
| Dissemination policy          | 31a | Plans for investigators and sponsor to communicate trial results to participants, healthcare professionals, the public, and other relevant groups (eg, via publication, reporting in results databases, or other data sharing arrangements), including any publication restrictions | 06     |
|                               | 31b | Authorship eligibility guidelines and any intended use of professional writers                                                                                                                                                                                                      | _____  |
|                               | 31c | Plans, if any, for granting public access to the full protocol, participant-level dataset, and statistical code                                                                                                                                                                     | _____  |
| <b>Appendices</b>             |     |                                                                                                                                                                                                                                                                                     |        |
| Informed consent materials    | 32  | Model consent form and other related documentation given to participants and authorised surrogates                                                                                                                                                                                  | _____  |
| Biological specimens          | 33  | Plans for collection, laboratory evaluation, and storage of biological specimens for genetic or molecular analysis in the current trial and for future use in ancillary studies, if applicable                                                                                      | _____  |

---

\*It is strongly recommended that this checklist be read in conjunction with the SPIRIT 2013 Explanation & Elaboration for important clarification on the items. Amendments to the protocol should be tracked and dated. The SPIRIT checklist is copyrighted by the SPIRIT Group under the Creative Commons "[Attribution-NonCommercial-NoDerivs 3.0 Unported](https://creativecommons.org/licenses/by-nc-nd/3.0/)" license.

## Attachment B – Assessment criteria by Frencken and Holmgren (2001)

| Score | Criteria                                                                                                                                 |
|-------|------------------------------------------------------------------------------------------------------------------------------------------|
| 0     | Present, good                                                                                                                            |
| 1     | Present, slight marginal defect for whatever reason, at any one place, which is less than 0.5 mm in depth. No repair is needed           |
| 2     | Present, marginal defect for whatever reason, at any one place which is deeper than 0.5 mm but less than 1.0 mm. Repair is needed        |
| 3     | Present, gross defect of more than 1.0 mm in depth. Repair is needed                                                                     |
| 4     | Not present, restoration has (almost) completely disappeared. Treatment is needed                                                        |
| 5     | Not present, other restorative treatment has been performed                                                                              |
| 6     | Not present, tooth has been extracted                                                                                                    |
| 7     | Present, wear and tear gradually over larger parts of the restoration but are less than 0.5 mm at the deepest point. No repair is needed |
| 8     | Present, wear and tear gradually over larger parts of the restoration which are deeper than 0.5 mm. Repair is needed                     |
| 9     | Unable to diagnose                                                                                                                       |

Note: Restorations considered to have survived are scored by codes: 0, 1 and 7; those considered to have failed by codes: 2, 3, 4 and 8; while those that are considered to be unrelated to success and failure are coded: 5 and 6.

## Attachment C – Assessment criteria by Roeleveld et al. (2006)

| Score | Criteria                                                                                                                                             |
|-------|------------------------------------------------------------------------------------------------------------------------------------------------------|
| 00    | Restoration still present, correct                                                                                                                   |
| 10    | Restoration present, slight defect at the margin and/or wear of the surface; < 0.5 mm in depth, repair needed                                        |
| 11    | Restoration present, defect at the margin and/or wear of the surface; > 0.5 mm in depth, repair needed                                               |
| 12    | Restoration present; underfilled > 0.5 mm, no gap, repair needed                                                                                     |
| 13    | Restoration overfilled > 0.5 mm, repair needed                                                                                                       |
| 20    | Secondary caries, discoloration in depth, surface hard and intact, caries within dentin; repair needed                                               |
| 21    | Secondary caries. Surface defect, caries within dentin; repair needed                                                                                |
| 30    | Restoration not present, bulk fracture, loose, (partly) lost; repair needed (if still possible without exposing the pulp)                            |
| 40    | Inflammation of the pulp (restoration still in situ, not categorized in the former categories); fistula or severe pain complaints; extraction needed |
| 50    | Tooth not present because of extraction                                                                                                              |
| 60    | Tooth not present because of shedding                                                                                                                |
| 70    | Tooth not present because of extraction                                                                                                              |
| 90    | Patient not present                                                                                                                                  |

Note: Restorations considered to have survived are scored by codes: 00 and 10; those considered to have by code: 11, 12, 13, 20, 21, 30 or 40; while those considered to be unrelated to success and failure are coded: 50, 60, 70 or 90

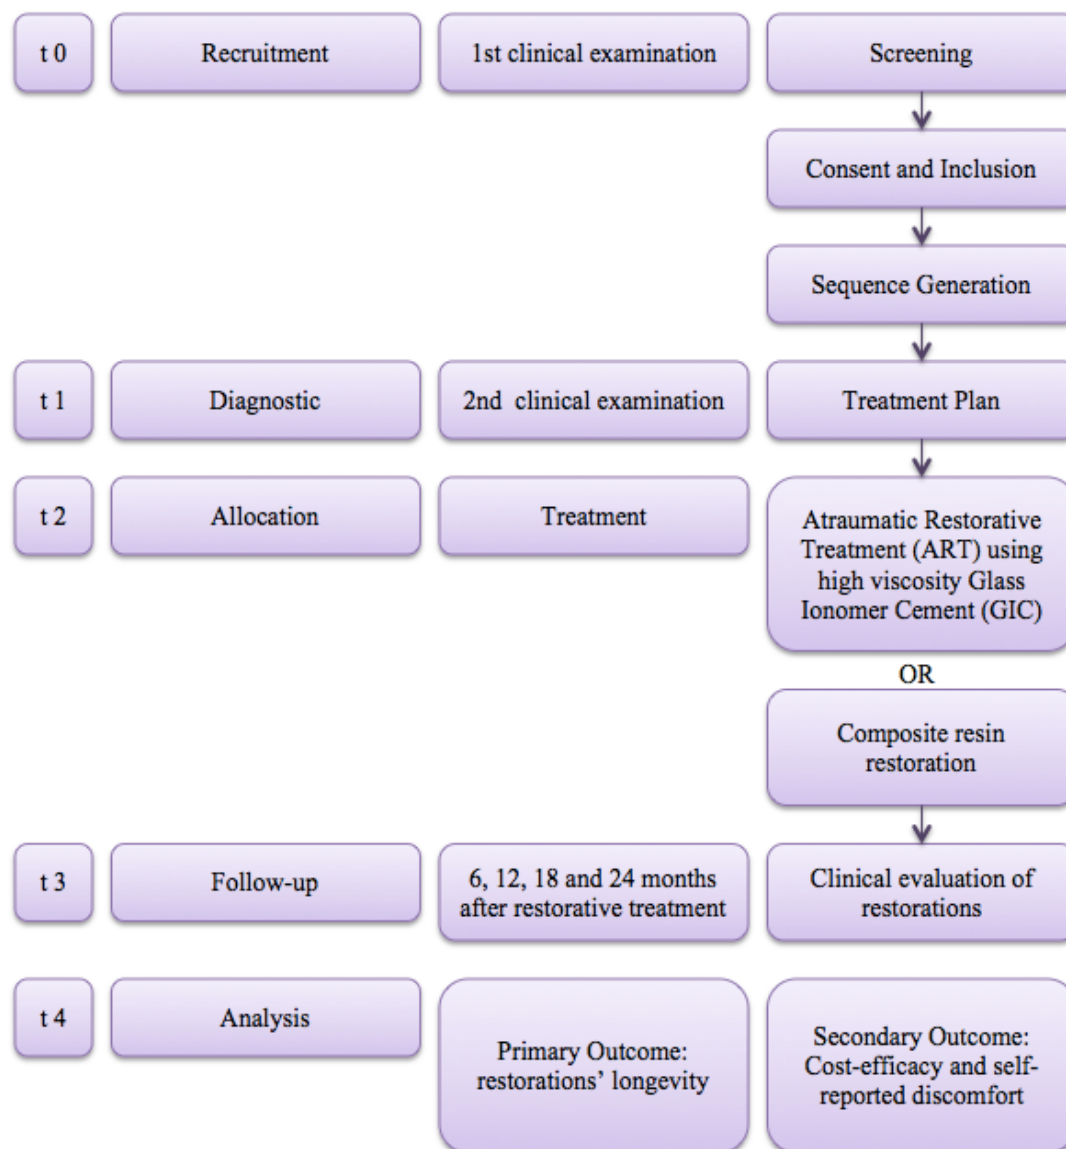

only

1  
2  
3  
4  
5  
6  
7  
8  
9  
10  
11  
12  
13  
14  
15  
16  
17  
18  
19  
20  
21  
22  
23  
24  
25  
26  
27  
28  
29  
30  
31  
32  
33  
34  
35  
36  
37  
38  
39  
40  
41  
42  
43  
44  
45  
46  
47  
48  
49  
50  
51  
52  
53  
54  
55  
56  
57  
58  
59  
60

1  
2  
3  
4  
5  
6  
7  
8  
9  
10  
11  
12  
13  
14  
15  
16  
17  
18  
19  
20  
21  
22  
23  
24  
25  
26  
27  
28  
29  
30  
31  
32  
33  
34  
35  
36  
37  
38  
39  
40  
41  
42  
43  
44  
45  
46  
47  
48  
49  
50  
51  
52  
53  
54  
55  
56  
57  
58  
59  
60

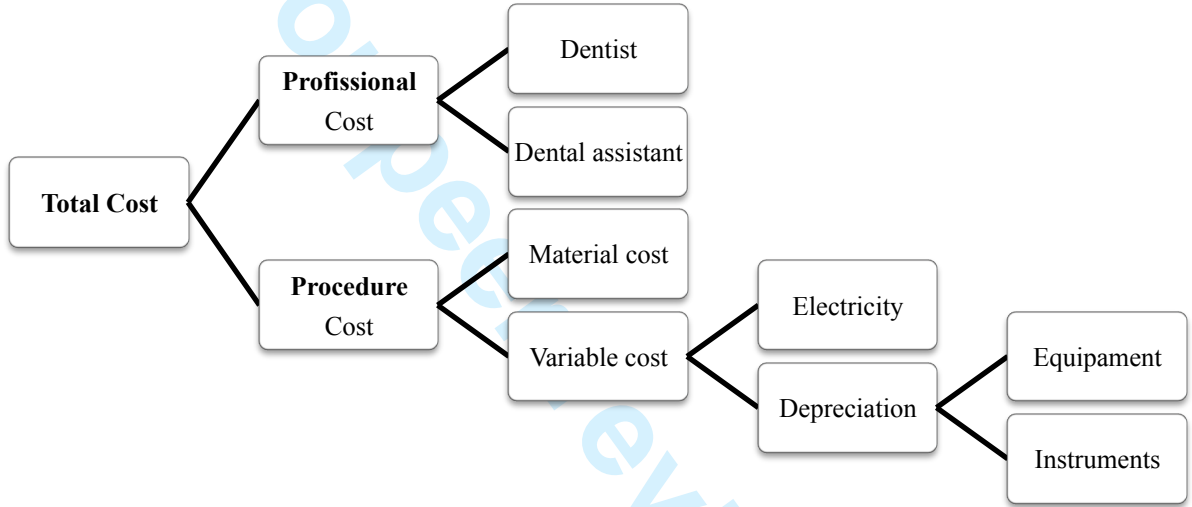

# BMJ Open

## Efficacy of conventional treatment with composite resin and atraumatic restorative treatment in posterior primary teeth: study protocol for a randomized controlled trial

|                                 |                                                                                                                                                                                                                                                                                                                                                                                                                                                                                                                                                                                                                                                                                                                                                                                                                                                                                                                                                                            |
|---------------------------------|----------------------------------------------------------------------------------------------------------------------------------------------------------------------------------------------------------------------------------------------------------------------------------------------------------------------------------------------------------------------------------------------------------------------------------------------------------------------------------------------------------------------------------------------------------------------------------------------------------------------------------------------------------------------------------------------------------------------------------------------------------------------------------------------------------------------------------------------------------------------------------------------------------------------------------------------------------------------------|
| Journal:                        | <i>BMJ Open</i>                                                                                                                                                                                                                                                                                                                                                                                                                                                                                                                                                                                                                                                                                                                                                                                                                                                                                                                                                            |
| Manuscript ID                   | bmjopen-2016-015542.R1                                                                                                                                                                                                                                                                                                                                                                                                                                                                                                                                                                                                                                                                                                                                                                                                                                                                                                                                                     |
| Article Type:                   | Protocol                                                                                                                                                                                                                                                                                                                                                                                                                                                                                                                                                                                                                                                                                                                                                                                                                                                                                                                                                                   |
| Date Submitted by the Author:   | 26-Apr-2017                                                                                                                                                                                                                                                                                                                                                                                                                                                                                                                                                                                                                                                                                                                                                                                                                                                                                                                                                                |
| Complete List of Authors:       | Ladewig, Nathalia; Universidade de Sao Paulo Faculdade de Odontologia, Orthodontics and Pediatric Dentistry<br>Saihara, Cintia ; Universidade de Sao Paulo Faculdade de Odontologia, Orthodontics and Pediatric Dentistry<br>Yoshioka, Laysa ; Universidade de Sao Paulo Faculdade de Odontologia, Orthodontics and Pediatric Dentistry<br>Olegário, Isabel; Universidade de Sao Paulo Faculdade de Odontologia, Orthodontics and Pediatric Dentistry<br>Floriano, Isabela; Universidade de Sao Paulo Faculdade de Odontologia, Orthodontics and Pediatric Dentistry<br>Tedesco, Tamara; Universidade Ibirapuera, Pediatric Dentistry<br>Mendes, Fausto; Universidade de Sao Paulo Faculdade de Odontologia, Orthodontics and Pediatric Dentistry<br>Braga, Mariana; Universidade de Sao Paulo Faculdade de Odontologia, Orthodontics and Pediatric Dentistry<br>Raggio, Daniela; Universidade de Sao Paulo Faculdade de Odontologia, Orthodontics and Pediatric Dentistry |
| <b>Primary Subject Heading</b>: | Dentistry and oral medicine                                                                                                                                                                                                                                                                                                                                                                                                                                                                                                                                                                                                                                                                                                                                                                                                                                                                                                                                                |
| Secondary Subject Heading:      | Dentistry and oral medicine, Health economics, Paediatrics, Patient-centred medicine                                                                                                                                                                                                                                                                                                                                                                                                                                                                                                                                                                                                                                                                                                                                                                                                                                                                                       |
| Keywords:                       | HEALTH ECONOMICS, ORAL MEDICINE, PAEDIATRICS                                                                                                                                                                                                                                                                                                                                                                                                                                                                                                                                                                                                                                                                                                                                                                                                                                                                                                                               |
|                                 |                                                                                                                                                                                                                                                                                                                                                                                                                                                                                                                                                                                                                                                                                                                                                                                                                                                                                                                                                                            |

SCHOLARONE™  
Manuscripts

1  
2  
3 1 Efficacy of conventional treatment with composite resin and atraumatic  
4  
5 2 restorative treatment in posterior primary teeth: study protocol for a  
6  
7 3 randomized controlled trial  
8

9  
10 4

11 5 **Nathalia Miranda Ladewig**

12 6 Department of Pediatric Dentistry, School of Dentistry, University of São Paulo, São

13  
14  
15  
16 7 Paulo, Brazil

17  
18 8 nladewig@usp.br

19  
20  
21 9 **Cíntia Saori Sahiara**

22  
23 10 Department of Pediatric Dentistry, School of Dentistry, University of São Paulo, São

24  
25 11 Paulo, Brazil

26  
27 12 cintia.saihara@usp.br

28  
29  
30 13 **Laysa Yoshioka**

31  
32 14 Department of Pediatric Dentistry, School of Dentistry, University of São Paulo, São

33  
34 15 Paulo, Brazil

35  
36 16 laysa.yoshioka@usp.br

37  
38 17 **Isabel Olegário**

39  
40 18 Department of Pediatric Dentistry, School of Dentistry, University of São Paulo, São

41  
42 19 Paulo, Brazil

43  
44 20 isabel.costa@usp.br

45  
46  
47 21 **Isabela Floriano**

48  
49 22 Department of Pediatric Dentistry, School of Dentistry, University of São Paulo, São

50  
51 23 Paulo, Brazil

52  
53 24 isabelafloriano@usp.br

54  
55  
56  
57 25



1  
2  
3 26 **Tamara Kerber Tedesco**  
4

5 27 Department of Pediatric Dentistry, School of Dentistry, University of Ibirapuera, São

6  
7 28 Paulo, Brazil

8  
9 29 tamarakt@usp.br  
10

11 30 **Fausto Medeiros Mendes**  
12

13 31 Department of Pediatric Dentistry, School of Dentistry, University of São Paulo, São

14  
15 32 Paulo, Brazil

16  
17 33 fmmendes@usp.br  
18

19 34 **Mariana Minatel Braga**  
20

21 35 Department of Pediatric Dentistry, School of Dentistry, University of São Paulo, São

22  
23 36 Paulo, Brazil

24  
25 37 mmbraga@usp.br  
26

27 38 **Daniela Prócida Raggio**  
28

29 39 Department of Pediatric Dentistry, School of Dentistry, University of São Paulo, São

30  
31 40 Paulo, Brazil

32  
33 41 danielar@usp.br  
34

35  
36 42

37 43 **Corresponding author**  
38

39 44 Daniela Prócida Raggio

40 45 Faculdade de Odontologia da Universidade de São Paulo

41 46 Av. Lineu Prestes, 2227

42 47 São Paulo – SP – Brazil

43 48 05508-000

44 49 E-mail: danielar@usp.br  
45

46 50  
47  
48  
49  
50  
51  
52  
53  
54  
55  
56  
57  
58  
59  
60

51 **Abstract**

52 **Introduction:** Despite the widespread acceptance of conventional treatment using  
53 composite resin in primary teeth, there is limited evidence that this approach is the  
54 best option in pediatric clinics. Atraumatic restorative treatment (ART) using high-  
55 viscosity glass ionomer cement (GIC) has gradually become more popular because it  
56 performs well in clinical studies, is easy to handle and is patient friendly. Therefore,  
57 the aim of this randomized clinical trial study is to compare the restoration longevity  
58 of conventional treatment using composite resin with that of ART in posterior  
59 primary teeth. As secondary outcomes, cost-efficacy and patient self-reported  
60 discomfort will also be tested.

61 **Methods and analysis:** Children aged 3 to 6 years presenting with at least one  
62 occlusal and/or occlusal-proximal cavity will be randomly assigned to one of two  
63 groups according to the dental treatment: ART (experimental group) or composite  
64 resin restoration (control group). The dental treatment will be performed at a dental  
65 care trailer located in an Educational Complex in Barueri/SP, Brazil. The unit of  
66 randomization will be the child. A sample size of 240 teeth with occlusal cavities and  
67 188 teeth with occlusal-proximal cavities has been calculated. The primary outcome  
68 will be restoration longevity, which will be clinical assessed after 6, 12, 18 and 24  
69 months by two examiners. The duration of the dental treatment and the cost of all  
70 materials used will be considered when estimating the cost-efficacy of each treatment.  
71 Individual discomfort will be measured after each dental procedure using the Facial  
72 Scale of Wong-Baker.

73 **Ethics and dissemination:** This clinical trial was approved by the Local Ethics  
74 Committee from the Faculty of Dentistry of the University of Sao Paulo (registration

1  
2  
3 75 #1.556.018). Participants will be included after their legal guardians have signed an  
4  
5 76 informed consent form containing detailed information about the research.  
6

7 77 **Trial registration:** www.clinicaltrials.gov, NCT02562456. Registered on September  
8  
9 78 25th 2015.  
10

11 79 **Keywords:** restorative dental treatment, primary teeth, composite resin, glass  
12  
13 80 ionomer cement, atraumatic restorative treatment, randomized clinical trial, cost-  
14  
15 81 efficacy analysis  
16  
17  
18  
19

### 20 21 83 **Strengths and limitations of this study**

- 22  
23 84 • Considering that the success of a restorative treatment is intrinsically related to  
24  
25 85 the handling of the material, it seems necessary to study these techniques  
26  
27 86 under controlled conditions to extract from them the best clinical performance  
28  
29 87 they can offer;  
30  
31 88 • An efficacy study can maximize the likelihood of observing an intervention  
32  
33 89 effect by investigating the benefits and harms of it under highly controlled  
34  
35 90 conditions;  
36  
37 91 • This is the first clinical trial comparing the longevity, cost-efficacy and self-  
38  
39 92 reported discomfort assessment between conventional restoration using  
40  
41 93 composite resin and ART with high-viscosity GIC in posterior primary teeth;  
42  
43 94 • Blinding of operators and patients will not be possible because of the evident  
44  
45 95 differences between the techniques.  
46  
47  
48  
49

50 96  
51 97  
52 98  
53 99  
54  
55  
56  
57  
58  
59  
60

## 100 **Introduction**

101 Restorative care in primary teeth is part of the comprehensive oral health treatment of  
102 children and adolescents,[1] which should guarantee appropriate functional and  
103 aesthetic conditions until tooth exfoliation.[2] There is an ongoing search for ideal  
104 restorative materials for use in pediatric dentistry,[1] but a lack of evidence  
105 persists.[3, 4, 5]

106 Conventional treatment using composite resin is still one of the most common  
107 approaches used in pediatric dental clinics.[6] Despite the aesthetic quality,  
108 preservation of dental structure, and abrasion wear rate similar to that of natural  
109 primary teeth,[6] all composite resins suffer polymerization shrinkage, which can  
110 jeopardize marginal integrity[2] and restoration longevity. Additionally, to take full  
111 advantage of the properties of composite resin, absolute isolation with rubber dam is  
112 necessary,[7] making the restoration not only technique-sensitive and time-  
113 consuming,[2] but also more traumatic for the pediatric patient.[8]

114 An alternative to the use of composite resin is atraumatic restorative treatment  
115 (ART), a minimal intervention approach that simplifies the restorative procedure  
116 through the exclusive use of hand instruments, followed by the application of a  
117 chemical-adhesive material.[9] ART is reported to provoke less anxiety and less pain,  
118 and rarely requires local anesthesia.[10] Currently, the material of choice for ART is  
119 high-viscosity glass ionomer cement (GIC),[11] which provides biocompatibility,  
120 fluoride release, chemical adhesion to the tooth surface[12] and a coefficient of  
121 thermal expansion similar to that of natural teeth.[4] Moreover, it is easy to use  
122 because it can be placed in a single increment.[2]

123 The international scientific literature has already designated ART as an  
124 appropriate procedure to treat occlusal and occlusal-proximal cavities in primary teeth

1  
2  
3 125 when compared with amalgam.[4, 5] However, few clinical studies have compared  
4  
5 126 composite resin performance in primary teeth with any other dental material.[13, 14,  
6  
7 127 15] Moreover, patient-based parameters must also be assessed in order to enable a  
8  
9 128 more effective and appropriate choice of treatment for each individual. In this context,  
10  
11 129 few reports have been found in the literature regarding those outcomes such as  
12  
13 130 patient's acceptability [16, 17] (Novaes et al., 2012; Staman et al., 2013) and cost of  
14  
15 131 restorative treatments.[18,19] (Da Mata et al., 2014; Mickenautsch et al., 2009).

16  
17  
18 132 Because of the need to establish the best scientific evidence about restorative  
19  
20 133 treatment in primary teeth, this study aims to compare the efficacy of two types of  
21  
22 134 treatment in primary molars (ART using high-viscosity GIC and composite resin  
23  
24 135 restoration) using a superiority randomized clinical trial with parallel arms.

25  
26  
27 136 Our hypothesis is that the longevity of restorations using the conventional  
28  
29 137 treatment with resin composite under rubber dam for occlusal and occlusal-proximal  
30  
31 138 cavities in primary molars differs from the longevity of atraumatic restorations using  
32  
33 139 high viscosity glass ionomer. Regarding the secondary outcomes, we expect that ART  
34  
35 140 has a better cost-efficacy and it is the only treatment highly accepted among children  
36  
37 141 in this study.

## 142 143 **Methods/Design**

144 The present protocol follows the guidelines of the Standard Protocol Items:  
145 Recommendations for Interventional Trials (SPIRIT) as detailed in Attachment A.

146 This clinical trial was recorded in the database for registration of clinical  
147 studies (Clinicaltrials.gov registration NCT02562456). This study is part of a  
148 partnership with the city of Barueri, São Paulo, and it is nested to the Caries Detection  
149 in Children-2 study (registration NCT02473107). Each participant will be encoded by

1  
2  
3 150 a number to guarantee information confidentiality. Any files containing identifiable  
4  
5 151 data will be stored in locked filing cabinets, and only researchers will have access to  
6  
7 152 participants' information.  
8

9  
10 153 The final trial dataset will be available for inspection with the coordinator's  
11  
12 154 endorsement. Results will be fully reported in peer-reviewed journals, the patients'  
13  
14 155 newsletter and on the website. If participants develop any dental treatment needs after  
15  
16 156 completion of the trial, they will be referred to the health service of the city of  
17  
18 157 Barueri, São Paulo.  
19

20  
21 158

22  
23 159 *Sample description*  
24

25 160 Participants will be selected after screening in a dental care trailer located in  
26  
27 161 the Professor Carlos Osmarinho de Lima Educational Complex (Barueri/SP). All  
28  
29 162 healthy children who live in the city of Barueri seeking dental treatment are potential  
30  
31 163 participants in our project. The trailer is set up as a regular dental office. The  
32  
33 164 inclusion criteria are: 1) children aged 3–6 years; 2) whose parents consent their  
34  
35 165 participation in the research; 3) with at least one occlusal and/or occlusal-proximal  
36  
37 166 cavity in a primary molar; 4) the carious lesion should be in dentin, clinically  
38  
39 167 classified as a shallow or a medium cavity; 5) the tooth of interest should not be  
40  
41 168 associated with a fistula, abscess, pulp exposure, history of spontaneous dental pain or  
42  
43 169 mobility; and 6) the cavity of interest should allow the access by the operator using  
44  
45 170 hand instruments (ICDAS 5 or 6). Children who present behavior problems during the  
46  
47 171 clinical examination or during dental treatment will be excluded from our study.  
48  
49

50  
51 172 The child will be set as the unit of randomization, which means that all  
52  
53 173 eligible teeth of a child included in our research will be treated according to the same  
54  
55 174 treatment independently of the number of cavities. For sample size calculation, data  
56  
57  
58  
59  
60

1  
2  
3 175 on the longevity of 2 years of occlusal and occlusal-proximal composite resin  
4  
5 176 restorations[15] were extracted from the literature as 86% and 60%, respectively. A  
6  
7 177 minimum difference of 10% between treatment longevities was set as the superiority  
8  
9  
10 178 limit. Taking the significance level as 5%, a power of 80% and the addition of 40%  
11  
12 179 owing to study design (cluster per children), the minimum number of teeth per group  
13  
14 180 was calculated using a two-tailed test. Additionally, a sample loss of 20% was  
15  
16 181 estimated, resulting in 204 teeth for the occlusal group and 240 teeth for the occlusal-  
17  
18 182 proximal group (Table 1).  
19

20  
21 18322  
23 184

Table 1 – Sample distribution.

| Groups                       | Type of cavity |                   |
|------------------------------|----------------|-------------------|
|                              | Occlusal       | Occlusal-proximal |
| Control<br>(Composite resin) | 102            | 120               |
| Experimental<br>(ART)        | 102            | 120               |
| Total                        | 204            | 240               |

24  
25  
26  
27  
28  
29  
30  
31  
32  
33  
34  
35  
36  
37  
38 185

39  
40  
41 186 Recruitment will take place from December 2015 to June 2017. Each  
42  
43 187 participant will be enrolled in the study for about 25 months: 1 month for the  
44  
45 188 Randomized Clinical Trial (RCT) diagnosis and treatment, followed by a 24-month  
46  
47 189 observation period. Details are illustrated in Figure 1. Participants' enrolment will be  
48  
49 190 facilitated by locating the trailer inside an Educational Complex.  
50

51  
52 191 After screening, participants who have met the eligibility criteria will have  
53  
54 192 their registration data collected and will be clinically examined by one operator.  
55  
56 193 Radiographic examination will be performed if any doubts about the pulp  
57  
58  
59  
60

1  
2  
3 194 involvement of the tooth of interest persist. As the child will receive complete dental  
4  
5 195 treatment during the study, radiographic examination will also be used if any other  
6  
7 196 treatment need demand it.  
8

9  
10 197 The same operator will also determine the dental caries experience of the child  
11  
12 198 which will be assessed based on the World Health Organization (WHO) criteria that  
13  
14 199 only considers evident carious cavities, and restored and/or missing teeth as a result of  
15  
16 200 carious progression.[20] Thus, the following indices will be calculated for each child:  
17  
18 201 def-t and DMFT; children in whom (def-t) + (DMFT) is lower than or equal to three  
19  
20 202 will be classified as having low dental caries experience. Children with higher scores  
21  
22 203 will be classified as having high dental caries experience.[21]  
23

24  
25 204 The randomization process will be designed in blocks of different sizes  
26  
27 205 generated by software. Opaque, sealed and sequentially numbered envelopes will be  
28  
29 206 used to randomize the participants into the treatment groups.  
30

31  
32 207 The restorative treatment will be performed by four trained and calibrated  
33  
34 208 operators who will disclose which treatment they are performing at the  
35  
36 209 commencement of the restorative procedure. However, blinding participants and  
37  
38 210 operators will not be possible due to the evident differences between both techniques.  
39

40  
41 211

42  
43 212 *Study groups*

44  
45 213 Participants will be randomly assigned into two different groups:

46  
47 214 (a) Group I (control): composite resin restoration, using 37% phosphoric acid, Adper  
48  
49 215 Scotchbond Multipurpose adhesive system (3M/ESPE) and Filtek Z350 resin-  
50  
51 216 composite (3M/ESPE).  
52

53  
54 217 (b) Group II (experimental): ART using high-viscosity GIC Fuji IX (Gold Label – GC  
55  
56 218 Corp) with manual dosage and hand-mixed powder and liquid.  
57  
58  
59  
60



1  
2  
3 219

4  
5 220 *Treatment protocol*

6  
7 221

8  
9 222 (a) Composite resin restoration

10  
11 223

12  
13  
14 224 All children from Group I will be treated according to conventional techniques

15  
16 225 using composite resin:

17  
18 226 • Use local anesthesia;

19  
20  
21 227 • Maintain absolute isolation of the operatory field with rubber dam and clamp;

22  
23 228 • Remove caries: use hand excavators to remove caries in dentin. Both infected

24  
25 229 and affected dentin should be removed from the dentin–enamel junction,

26  
27 230 maintaining the affected dentin in the remaining dental walls. If necessary,

28  
29 231 round bur at high speed under water cooling will be used to remove the

30  
31 232 unsupported enamel;

32  
33 233 • Etch enamel for 15 s and dentin for 7 s using 37% phosphoric acid, followed

34  
35 234 by rinsing for the same amount of time and drying with compressed air;

36  
37 235 • Apply the Adper Scotchbond Multipurpose adhesive system (3M/ESPE)

38  
39 236 according to the manufacturer's guidelines: primer application followed by

40  
41 237 gentle drying for 5 s; then polymerization of the adhesive for 10 s with the XL

42  
43 238 3000 curing light (3M/ESPE);

44  
45 239 • Apply light-cured Filtek Z350 resin (3M/ESPE) using the oblique incremental

46  
47 240 placement technique. Each increment should be polymerized for 20 s. In

48  
49 241 occlusal-proximal cavities, an adapted matrix strip should be used with a

50  
51 242 wooden wedge to maintain it in place, providing appropriate contour to the

52  
53 243 restoration;

- 1  
2  
3 244 • Remove the rubber dam and check the occlusion with articulating paper. If  
4  
5 245 necessary, finishing burs (F and FF) should be used under a cooling spray.  
6  
7 246

8  
9  
10 247 (b) Atraumatic Restorative Treatment (ART) using glass ionomer cement (GIC)  
11  
12 248

13  
14 249 All children from Group II will be treated according to the ART philosophy as  
15  
16 250 described by Frencken et al. (1996):[22]

- 17  
18 251 • Maintain relative isolation of the operatory field with cotton rolls;  
19  
20  
21 252 • Remove caries: using only hand excavators compatible with the size of the  
22  
23 253 carious cavity. Both infected and affected dentin should be removed from the  
24  
25 254 dentin–enamel junction. Thus, as described for Group I, the affected dentin  
26  
27 255 will be maintained in the remaining walls;  
28  
29  
30 256 • Clean the cavity: cavity walls should be cleaned with cotton balls moistened  
31  
32 257 with water;  
33  
34 258 • Condition the dentin: apply a drop of 11.5% polyacrylic acid on a cotton ball  
35  
36 259 for 15 s. Then, wash the cavity with three cotton balls moistened with water  
37  
38 260 and dry using three more cotton balls;  
39  
40  
41 261 • Use correct dosage (one spoon measure of the powder to one drop of  
42  
43 262 polyacrylic acid): place the polyacrylic acid flask vertically and upside down,  
44  
45 263 wait a few seconds until the bubbles rise and then drip two drops. Use the first  
46  
47 264 drop to condition the cavity, because this initial drop may contain bubbles;  
48  
49  
50 265 • Hand mix: spread the second drop of polyacrylic acid over the paper pad.  
51  
52 266 Then, mix the powder in with the acid in two stages—manipulate the first part  
53  
54 267 for 10 s and the second part for 15–20 s, applying moderate pressure. Use the  
55  
56 268 material only while it remains glossy;  
57  
58  
59  
60

- 1  
2  
3 269 • Apply GIC: insert the GIC with a #1 spatula followed by finger pressure using  
4  
5 270 petroleum jelly for a few seconds. For occlusal-proximal cavities, use an  
6  
7 271 adapted matrix strip with a wooden wedge to maintain it in place, providing  
8  
9  
10 272 appropriate contour to the restoration. Protecting the restoration with  
11  
12 273 petroleum jelly is necessary to inhibit syneresis and imbibition;
- 14 274 • Check the occlusion: after the initial set (approximately 5 min), check the  
15  
16 275 occlusion with articulating paper. If necessary, sharp hand instruments should  
17  
18 276 be used for adjustments. A new layer of petroleum jelly should be applied to  
19  
20  
21 277 the surface of the restoration;
- 23 278 • Instruct the patient not to eat solid food for 1 h.

25 279 Dental care other than restorative treatment related to this project will also be  
26  
27 280 provided in the dental care trailer by three operators trained in the same philosophy  
28  
29 281 regarding non-cavitated carious lesions [23] and pulp treatment [24]. Moreover, all  
30  
31 282 participants and their respective legal guardians will receive verbal instructions about  
32  
33 283 the use of toothpaste with a minimum concentration of 1000 ppm fluoride to prevent  
34  
35 284 dental caries.[25]

38 285 The risks related to the present research are similar to those found during  
39  
40 286 conventional clinical dental treatment. Thus, there is no Data Monitoring Committee.  
41  
42 287 Independent surveillance of trial data collection, management and analysis will be  
43  
44 288 undertaken by the principal investigator who has overall responsibility for the study  
45  
46  
47 289 and is in charge of the data.

49 290

51 291 *Outcomes*

53 292

1  
2  
3 293 The primary outcome will be the longevity of both restorative treatments after  
4  
5 294 follow-up for 2 years. Secondary outcomes will include the cost-efficacy of both  
6  
7 295 types of restorative treatment and self-reported discomfort.  
8

9  
10 296

11 297 (I) Longevity

12  
13  
14 298 Treatment longevity will be evaluated after 6, 12, 18 and 24 months by two  
15  
16 299 trained examiners. The intra-examiner and inter-examiner concordances will be  
17  
18 300 calculated using Cohen's Kappa test. Only scores above 0.7 will be accepted. After  
19  
20 301 prophylaxis, the occlusal restorations will be clinically evaluated according to the  
21  
22 302 Frencken and Holmgren[26] criteria (Attachment B).

23  
24  
25 303 For occlusal-proximal restorations, the adopted criteria are those proposed by  
26  
27 304 Roeleveld et al.[27] (Attachment C). The width and depth of marginal defects, the  
28  
29 305 surface wear and the excess or lack of material will be measured using the WHO CPI  
30  
31 306 periodontal probe, which has a ball-shaped tip 0.5 mm in diameter.

32  
33  
34 307 If any treatment need is noted at the return visits, the procedure will be  
35  
36 308 performed by one of the three trained operators until the case is resolved. Oral  
37  
38 309 hygiene and fluoride use instructions will be repeated at each return visit for all  
39  
40 310 children.

41  
42  
43 311 Data from each participant will be registered in clinical records for future  
44  
45 312 statistical analysis. Data quality will be ensured by validation checks that include  
46  
47 313 missing data, out of range values, and illogical and invalid responses. All data entered  
48  
49 314 will be audited by the coordinator, and data queries will be raised as necessary.

50  
51  
52 315

53 316 (II) Cost-efficacy

1  
2  
3 317 The direct cost analysis will be based on previous publications[28, 29]  
4  
5 318 adjusted to the Brazilian reality[30]. Both the professional cost and the procedure cost  
6  
7 319 will be considered (Figure 2).  
8

9  
10 320 To calculate the professional cost, we will use the previous calculation of  
11  
12 321 Floriano et al.[31], such that the time spent in each session will be converted to hours  
13  
14 322 and multiplied by the average income of a dentist per hour (\$13.89) and a dental  
15  
16 323 assistant per hour (\$7.06) as ruled by the Brazilian federal law n° 3999/61.[30, 31] To  
17  
18 324 estimate the procedure cost, we will consider both the variable cost, which includes  
19  
20 325 electricity and the depreciation of instruments and equipment, and the materials  
21  
22 326 cost.[28, 32] To calculate the instruments and equipment depreciation (peripherals  
23  
24 327 and dental chair), we will use the previous calculation of Da Mata et al.[18] and  
25  
26 328 Floriano et al.[29] that considers their cost, a lifespan of 3 years for instruments[18]  
27  
28 329 and 5 years for equipment[30] and a monthly use of 160 h.  
29  
30

31  
32 330 A researcher other than the operator will time each restorative treatment  
33  
34 331 session, including the return visits, and will register in predetermined sheets the  
35  
36 332 specifications and quantity of all materials used. Prices will be inferred from the  
37  
38 333 market value converted to US dollars and obtained by averaging the values from  
39  
40 334 different places that have commercialized the products used. The prices will also be  
41  
42 335 updated during the course of the study.  
43  
44

45 336 In order to estimate the cost-efficacy, the incremental cost-efficacy ratio  
46  
47 337 (ICER) will be estimated by dividing the average total cost by the survival after 2  
48  
49 338 years of each treatment:  
50

51  
52 339 
$$\text{ICER} = (\text{cost}_{\text{ART}} - \text{efficacy}_{\text{ART}}) / (\text{cost}_{\text{CT}} - \text{efficacy}_{\text{CT}})$$
  
53  
54 340

55  
56 341 (III) Child self-reported discomfort  
57  
58  
59  
60

1  
2  
3 342 The self-reported discomfort of each child will be evaluated using the Wong-  
4  
5 343 Baker Facial Scale.[33] This scale indicates the discomfort of an individual who has  
6  
7 344 to choose among six faces, each one expressing different facial expressions. The first  
8  
9 345 image is a smiling happy face, followed by gradually less cheerful expressions up to  
10  
11 346 the last one, which is a very sad face covered in tears. The scale will be applied  
12  
13 347 immediately after each restorative treatment session by the operator who is timing the  
14  
15 348 procedure.

16  
17  
18 349 The participant will be asked to choose the face that best match how he or she  
19  
20 350 felt during the treatment. This answer should be given solely by the child, with no  
21  
22 351 parental or professional interference.[34]

23  
24  
25 352

26  
27 353 *Data analysis*

28  
29 354 To compare the longevity of the restorations, both Kaplan–Meier survival  
30  
31 355 analysis and Cox regression with shared frailty will be applied. The association  
32  
33 356 between restoration longevity and caries experience or the type of cavity will also be  
34  
35 357 evaluated using Cox’s Regression with shared frailty. To determine the data  
36  
37 358 normality, the Kolmogorov–Smirnov test will be used. In relation to the secondary  
38  
39 359 outcomes, the comparison between groups in relation to the time spent in each  
40  
41 360 procedure as well as the average cost of a restoration will be done through the use of  
42  
43 361 linear regression adjusted to the cluster effect. Multilevel Poisson regression will be  
44  
45 362 used to compare both groups and the other independent variables to the self-reported  
46  
47 363 discomfort. The significance level will be adjusted to 5%.

48  
49  
50 364

51  
52 365 **Ethics and dissemination**

1  
2  
3 366 This clinical trial was approved by the Ethics Committee of Research in  
4  
5 367 Humans from the Faculty of Dentistry of the University of Sao Paulo (registration  
6  
7 368 #1.556.018). Participants will be included after their parents or legal guardians have  
8  
9  
10 369 signed an informed consent form containing detailed information about the research.

11 370 This study will involve the publication of grouped data collected from  
12  
13  
14 371 participants' individual information. This statement will be described in the consent  
15  
16 372 form of each participant.  
17

18  
19 373

#### 20 374 **Funding**

21  
22  
23 375 This work was supported by Fundação de Amparo à Pesquisa do Estado de São Paulo  
24  
25 376 (FAPESP) grants numbers 2015/11356-6 and 2012/50716-0.  
26

27 377

#### 28 29 378 **Authors' contributions**

30  
31  
32 379 DPR, MMB, FMM and IF contributed to the conception of this trial. DPR was  
33  
34 380 responsible for its design. DPR is the principal investigator and NML is trial  
35  
36 381 coordinator. DPR, NML and IO drafted the protocol. IF is in charge of the recruitment  
37  
38 382 of participants. NML is responsible for the patients' treatment. CSS and LY are  
39  
40 383 responsible for timekeeping, recording materials and organizing treatment. TKT is  
41  
42 384 responsible for patient evaluations over time. All authors critically reviewed and  
43  
44 385 approved the final manuscript as submitted.  
45

46 386

#### 47 48 49 387 **Competing interests**

50  
51  
52 388 We declare that there are no conflicts of interest regarding the performance of this  
53  
54 389 trial.  
55

56 390  
57  
58  
59  
60

1  
2  
3 391 **Acknowledgments**  
4

5 392 The authors would like to thank the Fundação de Amparo à Pesquisa do Estado de  
6  
7 393 São Paulo – FAPESP (Grants #2015/11356-6 and #2012/50716-0) for funding this  
8  
9 394 trial, and all undergraduate and postgraduate students involved in the dental care  
10  
11 395 trailer project. Finally, we acknowledge all participants in the postgraduate Pediatric  
12  
13 396 Dentistry Seminar of FOU SP for the constructive criticism they provided.  
14  
15

16 397

17  
18 398 **References**  
19

- 20 399 1. Dhar V, Hsu KL, Coll JA, Ginsberg E, Ball BM et al. Evidence-based update  
21  
22 400 of pediatric dental restoration procedures: dental materials. *Journal of Clinical*  
23  
24 401 *Pediatric Dentistry* 2015; 39(4): 303-10.  
25  
26  
27 402 2. Casagrande L, Dalpian DM, Ardenghi TM, Zanatta FB, Balbinot CEA et al.  
28  
29 403 Randomized clinical trial of adhesive restorations in primary molars. 18-  
30  
31 404 month results. *American Journal of Dentistry* 2013; 26 (6): 351-55.  
32  
33  
34 405 3. Yengopal V, Harnekar SY, Patel N, Siegfried N. Dental filling for the  
35  
36 406 treatment of caries in the primary dentition. *Cochrane Database of Systematic*  
37  
38 407 *Reviews*. 2009; doi: 10.1002/14651858.  
39  
40  
41 408 4. Mickenautsch S, Yengopal V, Banerjee A. Atraumatic restorative treatment  
42  
43 409 versus amalgam restoration longevity: A systematic review. *Clinical Oral*  
44  
45 410 *Investigations* 2010; 14: 233-240.  
46  
47  
48 411 5. Raggio DP, Hesse D, Lenzi TL, Guglielmi CAB, Braga MM. Is atraumatic  
49  
50 412 restorative treatment an option for restoring occlusoproximal caries lesions in  
51  
52 413 primary teeth? A systematic review and meta-analysis. *International Journal of*  
53  
54 414 *Paediatric Dentistry* 2012; 23: 435-43.  
55  
56 415 6. Qvist V, Poulsen A, Teglers PT, Mjör IA. The longevity of different  
57  
58  
59  
60



- 1  
2  
3 416 restorations in primary teeth. *International Journal of Paediatric Dentistry*  
4  
5 417 2010; 20: 1–7.  
6  
7 418 7. Heintze SD, Rousson V. Clinical effectiveness of direct Class II restoration: a  
8  
9 419 meta-analysis. *The Journal of Adhesive Dentistry* 2012; 14(5): 407-31.  
10  
11 420 8. Schriks MC, van Amerongen WE. Atraumatic perspectives of ART:  
12  
13 421 psychological and physiological aspects of treatment with and without rotary  
14  
15 422 instruments. *Community Dentistry and Oral Epidemiology* 2003; 31: 15–20.  
16  
17 423 9. Frencken JE, Pilot T, Songpaisan Y, Phantumvait P. Atraumatic restorative  
18  
19 424 treatment (ART): Rationale, technique, and development. *Journal of Public*  
20  
21 425 *Health Dentistry*. 1996; 56(3): 135-140.  
22  
23 426 10. Frencken JE. The State-of-Art of ART restorations. *Dental Update* 2014;  
24  
25 427 41(3):218-20.  
26  
27 428 11. van't Hof MA, Frencken JE, Van Palenstein Helderma WH, Holmgren WH.  
28  
29 429 The atraumatic restorative treatment (ART) approach for managing dental  
30  
31 430 caries: a meta-analysis. *International Dental Journal* 2006; 56(6): 345-51.  
32  
33 431 12. van Dijken JWV, Pallesen U. Long-term dentin retention of etch-and-rinse  
34  
35 432 and self-etch adhesives and a resin-modified glass ionomer cement in non-  
36  
37 433 carious cervical lesion. *Dental Materials* 2008; 24: 915–22.  
38  
39 434 13. Fuks AB, Araujo FB, Osorio LB, Hadami PE, Pinto AS. Clinical and  
40  
41 435 radiographic assessment of class II esthetic restorations in primary molars.  
42  
43 436 *Journal of Pediatric Dentistry* 2000; 22(5): 479-85.  
44  
45 437 14. Ersin NK, Candan U, Aykut A, Oncag O, Eronat C, Kose T. A clinical  
46  
47 438 evaluation of resin-based composite and glass-ionomer cement restorations  
48  
49 439 placed in primary teeth using the ART approach. *Journal of the American*  
50  
51 440 *Dental Association* 2006; 137: 1529-36.  
52  
53  
54  
55  
56  
57  
58  
59  
60

- 1  
2  
3 441 15. Alves dos Santos MP, Luiz RR, Maia LC. Randomized trial of resin-based  
4  
5 442 restorations in class I and class II beveled preparations in primary molars: 48-  
6  
7 443 month results. *Journal of Dentistry*. 2010; 38(6): 451-59.  
8  
9  
10 444 16. Novaes TF, Matos R, Raggio DP, Braga MM, Mendes FM. Children's  
11  
12 445 discomfort in assessments using different methods for approximal caries  
13  
14 446 detection. *Braz. Oral Res*. 2012; 26(2): 93-99.  
15  
16 447 17. Staman NM, Townsend JA, Hagan JL. Observational study: discomfort  
17  
18 448 following dental procedures for children. *Pediatr. Dent*. 2013; 35(1): 52-4.  
19  
20  
21 449 18. Da Mata C, Allen PF, Cronin M, O'Mahony D, McKenna G, Woods N.  
22  
23 450 Cost-effectiveness of ART restorations in elderly adults: a randomized clinical  
24  
25 451 trial. *Community Dentistry and Oral Epidemiology* 2014; 42: 79-87.  
26  
27 452 19. Mickenautsch S, Munshi I, Grossman ES. Comparative cost of Art and  
28  
29 453 conventional treatment within a dental school clinic. *Journal of Minimum*  
30  
31 454 *Intervention in Dentistry*. 2009; 2(2): 135-145.  
32  
33  
34 455 20. WHO (World Health Organization). *Oral health surveys: basic methods*. 3ed.  
35  
36 456 Geneva: World Health Organization; 1997. (20)  
37  
38 457 21. Brasil. Ministério da Saúde (MS). Projeto SB Brasil 2010: condições de saúde  
39  
40 458 bucal da população brasileira 2009-2010. Resultados principais. Brasília:  
41  
42 459 2012.  
43  
44 460 22. Frencken JE, Pilot T, Songpaisan Y, Phantumvanit P. Atraumatic restorative  
45  
46 461 treatment (ART): rationale, technique, and development. *Journal of Public*  
47  
48 462 *Health Dentistry*. 1996; 56(3): 135-140.  
49  
50  
51 463 23. Gibson G, Jurasic MM, Wehler CJ, Jones JA. Supplemental fluoride use for  
52  
53 464 moderate and high caries risk adults: a systematic review. *Journal of Public*  
54  
55 465 *Health Dentistry* 2011;71(3):171-84.  
56  
57  
58  
59  
60

- 1  
2  
3 466 24. Cerqueira DF, Mello-Moura AC, Santos EM, Guedes-Pinto AC. Cytotoxicity,  
4  
5 467 histopathological, microbiological and clinical aspects of an endodontic  
6  
7 468 iodoform-based paste used in pediatric dentistry: a review. *Journal of Clinical*  
8  
9 469 *Pediatric Dentistry* 2008;32(2):105-10.
- 10  
11 470 25. Walsh T, Worthington HV, Glenny AM, Appelbe P, Marinho VC, Shi X.  
12  
13 471 Fluoride toothpastes of different concentrations for preventing dental caries in  
14  
15 472 children and adolescents. *Cochrane Database Systematic Review* 2010; 20(1):  
16  
17 473 1-221
- 18  
19 474 26. Frencken JE, Holmgren CF. Tratamento restaurador atraumático (ART) para a  
20  
21 475 cárie dentária. São Paulo: Santos. 2001.
- 22  
23 476 27. Roeleveld AC, Van Amerongen WE, Mandari GJ. Influence of residual caries  
24  
25 477 and cervical gaps on the survival rate of Class II glass ionomer restorations.  
26  
27 478 *European Archives of Paediatric Dentistry* 2006; 7(2): 85-91.
- 28  
29 479 28. Takanashi Y, Penrod JR, Lund JP, Feine JS. A cost comparison of mandibular  
30  
31 480 two-implant overdenture and conventional denture treatment. *International*  
32  
33 481 *Journal of Prosthodontics* 2004; 17: 181-86
- 34  
35 482 29. Oscarson N, Kallestal C, Fjelddahl A, Lindholm L. Cost effectiveness of  
36  
37 483 different caries preventive measures in a high-risk population of Swedish  
38  
39 484 adolescents. *Community Dentistry and Oral Epidemiology* 2003; 31(3): 169-  
40  
41 485 178.
- 42  
43 486 30. Floriano I, Gimenez R, Reyes A, Matos R, Mattos-Silveira, J, Mendes FM.;  
44  
45 487 Braga MM. Análise de custos de diferentes abordagens para avaliação de  
46  
47 488 lesões de cárie em dentes decíduos. *Brazilian Oral Research*. 2013; 27(1): 41-  
48  
49 489 9.
- 50  
51 490 31. Morita MC, Haddad AE, Araújo ME. Perfil atual e tendências do cirurgião-

- 1  
2  
3 491 dentista brasileiro. Maringá: Dental Press Internacional. 2010.  
4  
5 492 32. Kawai Y, Murakami H, Takanashi Y, Lund JP, Feine JS. Efficient resource  
6  
7 493 use in simplified complete denture fabrication. Journal of Prosthodontics  
8  
9 494 2010; 19: 512-16.  
10  
11 495 33. Wong DL, Baker CM. Pain in children: comparison of assessment scales.  
12  
13 496 Pediatric Nursing. 1988; 14(1): 9-17.  
14  
15 497 34. Novaes TF, Matos R, Raggio DP, Imperato JC, Braga MM, Mendes FM.  
16  
17 498 Influence of the discomfort reported by children on the performance of  
18  
19 499 approximal caries detection methods. Caries Research. 2010; 44(5): 465-71.  
20  
21  
22  
23  
24  
25  
26  
27  
28  
29  
30  
31  
32  
33  
34  
35  
36  
37  
38  
39  
40  
41  
42  
43  
44  
45  
46  
47  
48  
49  
50  
51  
52  
53  
54  
55  
56  
57  
58  
59  
60

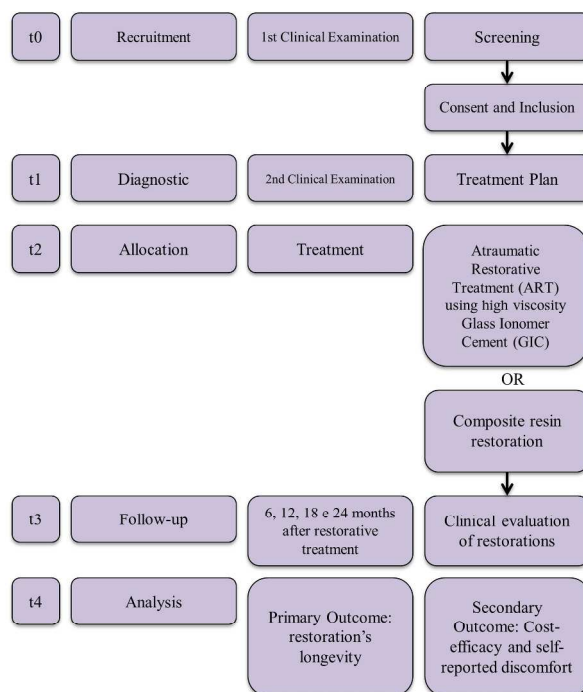

Figure 1: Clinical trial's timeline

254x190mm (300 x 300 DPI)

ew only

1  
2  
3  
4  
5  
6  
7  
8  
9  
10  
11  
12  
13  
14  
15  
16  
17  
18  
19  
20  
21  
22  
23  
24  
25  
26  
27  
28  
29  
30  
31  
32  
33  
34  
35  
36  
37  
38  
39  
40  
41  
42  
43  
44  
45  
46  
47  
48  
49  
50  
51  
52  
53  
54  
55  
56  
57  
58  
59  
60

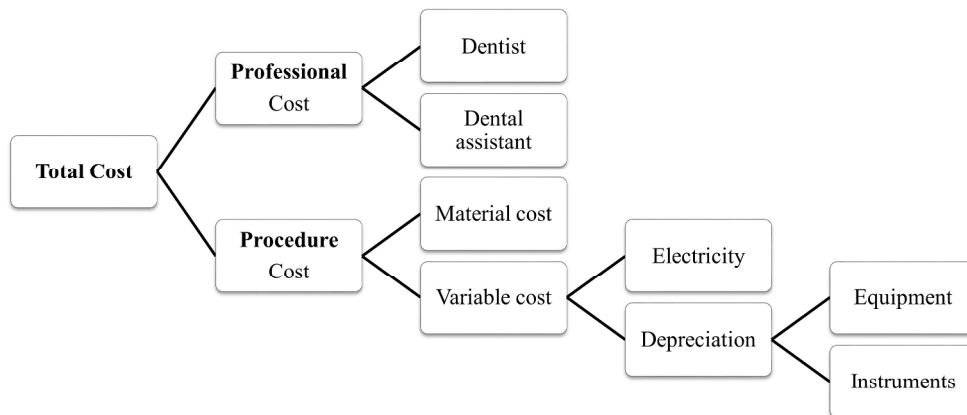

Figure 2: Diagram of total cost calculation

254x190mm (300 x 300 DPI)

ew only

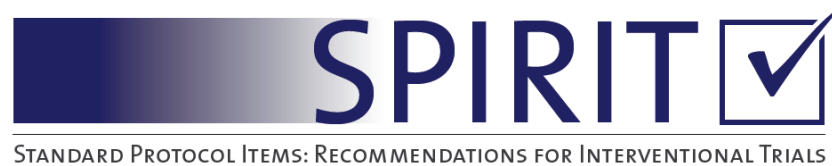

STANDARD PROTOCOL ITEMS: RECOMMENDATIONS FOR INTERVENTIONAL TRIALS

SPIRIT 2013 Checklist: Recommended items to address in a clinical trial protocol and related documents\*

| Section/item                      | Item No | Description                                                                                                                                                                                                                                                                              | Addressed on page number |
|-----------------------------------|---------|------------------------------------------------------------------------------------------------------------------------------------------------------------------------------------------------------------------------------------------------------------------------------------------|--------------------------|
| <b>Administrative information</b> |         |                                                                                                                                                                                                                                                                                          |                          |
| Title                             | 1       | Descriptive title identifying the study design, population, interventions, and, if applicable, trial acronym                                                                                                                                                                             | 01                       |
| Trial registration                | 2a      | Trial identifier and registry name. If not yet registered, name of intended registry                                                                                                                                                                                                     | 04                       |
|                                   | 2b      | All items from the World Health Organization Trial Registration Data Set                                                                                                                                                                                                                 | _____                    |
| Protocol version                  | 3       | Date and version identifier                                                                                                                                                                                                                                                              | 04                       |
| Funding                           | 4       | Sources and types of financial, material, and other support                                                                                                                                                                                                                              | 15                       |
| Roles and responsibilities        | 5a      | Names, affiliations, and roles of protocol contributors                                                                                                                                                                                                                                  | 01, 02                   |
|                                   | 5b      | Name and contact information for the trial sponsor                                                                                                                                                                                                                                       | 02                       |
|                                   | 5c      | Role of study sponsor and funders, if any, in study design; collection, management, analysis, and interpretation of data; writing of the report; and the decision to submit the report for publication, including whether they will have ultimate authority over any of these activities | 16                       |
|                                   | 5d      | Composition, roles, and responsibilities of the coordinating centre, steering committee, endpoint adjudication committee, data management team, and other individuals or groups overseeing the trial, if applicable (see Item 21a for data monitoring committee)                         | _____                    |

1 **Introduction**

2

3 Background and 6a Description of research question and justification for undertaking the trial, including summary of relevant 05  
 4 rationale studies (published and unpublished) examining benefits and harms for each intervention

5

6 6b Explanation for choice of comparators 05

7

8 Objectives 7 Specific objectives or hypotheses 06

9

10 Trial design 8 Description of trial design including type of trial (eg, parallel group, crossover, factorial, single group),  
 11 allocation ratio, and framework (eg, superiority, equivalence, noninferiority, exploratory) 06

12

13

14 **Methods: Participants, interventions, and outcomes**

15

16 Study setting 9 Description of study settings (eg, community clinic, academic hospital) and list of countries where data will 07  
 17 be collected. Reference to where list of study sites can be obtained

18

19 Eligibility criteria 10 Inclusion and exclusion criteria for participants. If applicable, eligibility criteria for study centres and 07  
 20 individuals who will perform the interventions (eg, surgeons, psychotherapists)

21

22 Interventions 11a Interventions for each group with sufficient detail to allow replication, including how and when they will be 09, 10, 11, 12  
 23 administered

24

25 11b Criteria for discontinuing or modifying allocated interventions for a given trial participant (eg, drug dose \_\_\_\_\_  
 26 change in response to harms, participant request, or improving/worsening disease)

27

28 11c Strategies to improve adherence to intervention protocols, and any procedures for monitoring adherence \_\_\_\_\_  
 29 (eg, drug tablet return, laboratory tests)

30

31 11d Relevant concomitant care and interventions that are permitted or prohibited during the trial \_\_\_\_\_

32

33 Outcomes 12 Primary, secondary, and other outcomes, including the specific measurement variable (eg, systolic blood  
 34 pressure), analysis metric (eg, change from baseline, final value, time to event), method of aggregation (eg, 12, 13, 14  
 35 median, proportion), and time point for each outcome. Explanation of the clinical relevance of chosen  
 36 efficacy and harm outcomes is strongly recommended

37

38 Participant timeline 13 Time schedule of enrolment, interventions (including any run-ins and washouts), assessments, and visits for 08  
 39 participants. A schematic diagram is highly recommended (see Figure)

40

41

42

43

44

45

46

47



|    |                                                                     |     |                                                                                                                                                                                                                                                                                                                                                                                                              |         |
|----|---------------------------------------------------------------------|-----|--------------------------------------------------------------------------------------------------------------------------------------------------------------------------------------------------------------------------------------------------------------------------------------------------------------------------------------------------------------------------------------------------------------|---------|
| 1  | Sample size                                                         | 14  | Estimated number of participants needed to achieve study objectives and how it was determined, including clinical and statistical assumptions supporting any sample size calculations                                                                                                                                                                                                                        | 07      |
| 2  |                                                                     |     |                                                                                                                                                                                                                                                                                                                                                                                                              |         |
| 3  |                                                                     |     |                                                                                                                                                                                                                                                                                                                                                                                                              |         |
| 4  | Recruitment                                                         | 15  | Strategies for achieving adequate participant enrolment to reach target sample size                                                                                                                                                                                                                                                                                                                          | 08      |
| 5  |                                                                     |     |                                                                                                                                                                                                                                                                                                                                                                                                              |         |
| 6  |                                                                     |     |                                                                                                                                                                                                                                                                                                                                                                                                              |         |
| 7  | <b>Methods: Assignment of interventions (for controlled trials)</b> |     |                                                                                                                                                                                                                                                                                                                                                                                                              |         |
| 8  | Allocation:                                                         |     |                                                                                                                                                                                                                                                                                                                                                                                                              |         |
| 9  |                                                                     |     |                                                                                                                                                                                                                                                                                                                                                                                                              |         |
| 10 | Sequence                                                            | 16a | Method of generating the allocation sequence (eg, computer-generated random numbers), and list of any factors for stratification. To reduce predictability of a random sequence, details of any planned restriction (eg, blocking) should be provided in a separate document that is unavailable to those who enrol participants or assign interventions                                                     | 09      |
| 11 | generation                                                          |     |                                                                                                                                                                                                                                                                                                                                                                                                              |         |
| 12 |                                                                     |     |                                                                                                                                                                                                                                                                                                                                                                                                              |         |
| 13 |                                                                     |     |                                                                                                                                                                                                                                                                                                                                                                                                              |         |
| 14 |                                                                     |     |                                                                                                                                                                                                                                                                                                                                                                                                              |         |
| 15 |                                                                     |     |                                                                                                                                                                                                                                                                                                                                                                                                              |         |
| 16 | Allocation                                                          | 16b | Mechanism of implementing the allocation sequence (eg, central telephone; sequentially numbered, opaque, sealed envelopes), describing any steps to conceal the sequence until interventions are assigned                                                                                                                                                                                                    | 09      |
| 17 | concealment                                                         |     |                                                                                                                                                                                                                                                                                                                                                                                                              |         |
| 18 | mechanism                                                           |     |                                                                                                                                                                                                                                                                                                                                                                                                              |         |
| 19 |                                                                     |     |                                                                                                                                                                                                                                                                                                                                                                                                              |         |
| 20 |                                                                     |     |                                                                                                                                                                                                                                                                                                                                                                                                              |         |
| 21 | Implementation                                                      | 16c | Who will generate the allocation sequence, who will enrol participants, and who will assign participants to interventions                                                                                                                                                                                                                                                                                    | 08 e 09 |
| 22 |                                                                     |     |                                                                                                                                                                                                                                                                                                                                                                                                              |         |
| 23 |                                                                     |     |                                                                                                                                                                                                                                                                                                                                                                                                              |         |
| 24 | Blinding (masking)                                                  | 17a | Who will be blinded after assignment to interventions (eg, trial participants, care providers, outcome assessors, data analysts), and how                                                                                                                                                                                                                                                                    | 09      |
| 25 |                                                                     |     |                                                                                                                                                                                                                                                                                                                                                                                                              |         |
| 26 |                                                                     |     |                                                                                                                                                                                                                                                                                                                                                                                                              |         |
| 27 |                                                                     |     |                                                                                                                                                                                                                                                                                                                                                                                                              |         |
| 28 |                                                                     | 17b | If blinded, circumstances under which unblinding is permissible, and procedure for revealing a participant's allocated intervention during the trial                                                                                                                                                                                                                                                         | _____   |
| 29 |                                                                     |     |                                                                                                                                                                                                                                                                                                                                                                                                              |         |
| 30 |                                                                     |     |                                                                                                                                                                                                                                                                                                                                                                                                              |         |
| 31 |                                                                     |     |                                                                                                                                                                                                                                                                                                                                                                                                              |         |
| 32 | <b>Methods: Data collection, management, and analysis</b>           |     |                                                                                                                                                                                                                                                                                                                                                                                                              |         |
| 33 |                                                                     |     |                                                                                                                                                                                                                                                                                                                                                                                                              |         |
| 34 | Data collection                                                     | 18a | Plans for assessment and collection of outcome, baseline, and other trial data, including any related processes to promote data quality (eg, duplicate measurements, training of assessors) and a description of study instruments (eg, questionnaires, laboratory tests) along with their reliability and validity, if known. Reference to where data collection forms can be found, if not in the protocol | 12      |
| 35 | methods                                                             |     |                                                                                                                                                                                                                                                                                                                                                                                                              |         |
| 36 |                                                                     |     |                                                                                                                                                                                                                                                                                                                                                                                                              |         |
| 37 |                                                                     |     |                                                                                                                                                                                                                                                                                                                                                                                                              |         |
| 38 |                                                                     |     |                                                                                                                                                                                                                                                                                                                                                                                                              |         |
| 39 |                                                                     |     |                                                                                                                                                                                                                                                                                                                                                                                                              |         |
| 40 |                                                                     | 18b | Plans to promote participant retention and complete follow-up, including list of any outcome data to be collected for participants who discontinue or deviate from intervention protocols                                                                                                                                                                                                                    | _____   |
| 41 |                                                                     |     |                                                                                                                                                                                                                                                                                                                                                                                                              |         |
| 42 |                                                                     |     |                                                                                                                                                                                                                                                                                                                                                                                                              |         |
| 43 |                                                                     |     |                                                                                                                                                                                                                                                                                                                                                                                                              |         |
| 44 |                                                                     |     |                                                                                                                                                                                                                                                                                                                                                                                                              |         |
| 45 |                                                                     |     |                                                                                                                                                                                                                                                                                                                                                                                                              |         |
| 46 |                                                                     |     |                                                                                                                                                                                                                                                                                                                                                                                                              |         |
| 47 |                                                                     |     |                                                                                                                                                                                                                                                                                                                                                                                                              |         |

|    |                                 |     |                                                                                                                                                                                                                                                                                                                                       |        |
|----|---------------------------------|-----|---------------------------------------------------------------------------------------------------------------------------------------------------------------------------------------------------------------------------------------------------------------------------------------------------------------------------------------|--------|
| 1  | Data management                 | 19  | Plans for data entry, coding, security, and storage, including any related processes to promote data quality (eg, double data entry; range checks for data values). Reference to where details of data management procedures can be found, if not in the protocol                                                                     | 06     |
| 2  |                                 |     |                                                                                                                                                                                                                                                                                                                                       |        |
| 3  |                                 |     |                                                                                                                                                                                                                                                                                                                                       |        |
| 4  |                                 |     |                                                                                                                                                                                                                                                                                                                                       |        |
| 5  | Statistical methods             | 20a | Statistical methods for analysing primary and secondary outcomes. Reference to where other details of the statistical analysis plan can be found, if not in the protocol                                                                                                                                                              | 15     |
| 6  |                                 |     |                                                                                                                                                                                                                                                                                                                                       |        |
| 7  |                                 |     |                                                                                                                                                                                                                                                                                                                                       |        |
| 8  |                                 | 20b | Methods for any additional analyses (eg, subgroup and adjusted analyses)                                                                                                                                                                                                                                                              | 15     |
| 9  |                                 |     |                                                                                                                                                                                                                                                                                                                                       |        |
| 10 |                                 | 20c | Definition of analysis population relating to protocol non-adherence (eg, as randomised analysis), and any statistical methods to handle missing data (eg, multiple imputation)                                                                                                                                                       | _____  |
| 11 |                                 |     |                                                                                                                                                                                                                                                                                                                                       |        |
| 12 |                                 |     |                                                                                                                                                                                                                                                                                                                                       |        |
| 13 |                                 |     |                                                                                                                                                                                                                                                                                                                                       |        |
| 14 | <b>Methods: Monitoring</b>      |     |                                                                                                                                                                                                                                                                                                                                       |        |
| 15 |                                 |     |                                                                                                                                                                                                                                                                                                                                       |        |
| 16 | Data monitoring                 | 21a | Composition of data monitoring committee (DMC); summary of its role and reporting structure; statement of whether it is independent from the sponsor and competing interests; and reference to where further details about its charter can be found, if not in the protocol. Alternatively, an explanation of why a DMC is not needed | 12     |
| 17 |                                 |     |                                                                                                                                                                                                                                                                                                                                       |        |
| 18 |                                 | 21b | Description of any interim analyses and stopping guidelines, including who will have access to these interim results and make the final decision to terminate the trial                                                                                                                                                               | _____  |
| 19 |                                 |     |                                                                                                                                                                                                                                                                                                                                       |        |
| 20 |                                 |     |                                                                                                                                                                                                                                                                                                                                       |        |
| 21 |                                 |     |                                                                                                                                                                                                                                                                                                                                       |        |
| 22 |                                 |     |                                                                                                                                                                                                                                                                                                                                       |        |
| 23 |                                 |     |                                                                                                                                                                                                                                                                                                                                       |        |
| 24 |                                 |     |                                                                                                                                                                                                                                                                                                                                       |        |
| 25 | Harms                           | 22  | Plans for collecting, assessing, reporting, and managing solicited and spontaneously reported adverse events and other unintended effects of trial interventions or trial conduct                                                                                                                                                     | 06, 12 |
| 26 |                                 |     |                                                                                                                                                                                                                                                                                                                                       |        |
| 27 |                                 |     |                                                                                                                                                                                                                                                                                                                                       |        |
| 28 |                                 |     |                                                                                                                                                                                                                                                                                                                                       |        |
| 29 | Auditing                        | 23  | Frequency and procedures for auditing trial conduct, if any, and whether the process will be independent from investigators and the sponsor                                                                                                                                                                                           | 12     |
| 30 |                                 |     |                                                                                                                                                                                                                                                                                                                                       |        |
| 31 |                                 |     |                                                                                                                                                                                                                                                                                                                                       |        |
| 32 |                                 |     |                                                                                                                                                                                                                                                                                                                                       |        |
| 33 | <b>Ethics and dissemination</b> |     |                                                                                                                                                                                                                                                                                                                                       |        |
| 34 |                                 |     |                                                                                                                                                                                                                                                                                                                                       |        |
| 35 | Research ethics approval        | 24  | Plans for seeking research ethics committee/institutional review board (REC/IRB) approval                                                                                                                                                                                                                                             | 15     |
| 36 |                                 |     |                                                                                                                                                                                                                                                                                                                                       |        |
| 37 |                                 |     |                                                                                                                                                                                                                                                                                                                                       |        |
| 38 | Protocol amendments             | 25  | Plans for communicating important protocol modifications (eg, changes to eligibility criteria, outcomes, analyses) to relevant parties (eg, investigators, REC/IRBs, trial participants, trial registries, journals, regulators)                                                                                                      | _____  |
| 39 |                                 |     |                                                                                                                                                                                                                                                                                                                                       |        |
| 40 |                                 |     |                                                                                                                                                                                                                                                                                                                                       |        |
| 41 |                                 |     |                                                                                                                                                                                                                                                                                                                                       |        |
| 42 |                                 |     |                                                                                                                                                                                                                                                                                                                                       |        |
| 43 |                                 |     |                                                                                                                                                                                                                                                                                                                                       |        |
| 44 |                                 |     |                                                                                                                                                                                                                                                                                                                                       |        |
| 45 |                                 |     |                                                                                                                                                                                                                                                                                                                                       |        |
| 46 |                                 |     |                                                                                                                                                                                                                                                                                                                                       |        |
| 47 |                                 |     |                                                                                                                                                                                                                                                                                                                                       |        |

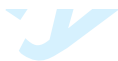

|    |                               |     |                                                                                                                                                                                                                                                                                     |        |
|----|-------------------------------|-----|-------------------------------------------------------------------------------------------------------------------------------------------------------------------------------------------------------------------------------------------------------------------------------------|--------|
| 1  | Consent or assent             | 26a | Who will obtain informed consent or assent from potential trial participants or authorised surrogates, and how (see Item 32)                                                                                                                                                        | 07, 15 |
| 2  |                               |     |                                                                                                                                                                                                                                                                                     |        |
| 3  |                               |     |                                                                                                                                                                                                                                                                                     |        |
| 4  |                               | 26b | Additional consent provisions for collection and use of participant data and biological specimens in ancillary studies, if applicable                                                                                                                                               | _____  |
| 5  |                               |     |                                                                                                                                                                                                                                                                                     |        |
| 6  |                               |     |                                                                                                                                                                                                                                                                                     |        |
| 7  | Confidentiality               | 27  | How personal information about potential and enrolled participants will be collected, shared, and maintained in order to protect confidentiality before, during, and after the trial                                                                                                | 06     |
| 8  |                               |     |                                                                                                                                                                                                                                                                                     |        |
| 9  |                               |     |                                                                                                                                                                                                                                                                                     |        |
| 10 | Declaration of interests      | 28  | Financial and other competing interests for principal investigators for the overall trial and each study site                                                                                                                                                                       | 16     |
| 11 |                               |     |                                                                                                                                                                                                                                                                                     |        |
| 12 |                               |     |                                                                                                                                                                                                                                                                                     |        |
| 13 | Access to data                | 29  | Statement of who will have access to the final trial dataset, and disclosure of contractual agreements that limit such access for investigators                                                                                                                                     | 06     |
| 14 |                               |     |                                                                                                                                                                                                                                                                                     |        |
| 15 |                               |     |                                                                                                                                                                                                                                                                                     |        |
| 16 |                               |     |                                                                                                                                                                                                                                                                                     |        |
| 17 | Ancillary and post-trial care | 30  | Provisions, if any, for ancillary and post-trial care, and for compensation to those who suffer harm from trial participation                                                                                                                                                       | 06     |
| 18 |                               |     |                                                                                                                                                                                                                                                                                     |        |
| 19 |                               |     |                                                                                                                                                                                                                                                                                     |        |
| 20 | Dissemination policy          | 31a | Plans for investigators and sponsor to communicate trial results to participants, healthcare professionals, the public, and other relevant groups (eg, via publication, reporting in results databases, or other data sharing arrangements), including any publication restrictions | 06     |
| 21 |                               |     |                                                                                                                                                                                                                                                                                     |        |
| 22 |                               |     |                                                                                                                                                                                                                                                                                     |        |
| 23 |                               |     |                                                                                                                                                                                                                                                                                     |        |
| 24 |                               |     |                                                                                                                                                                                                                                                                                     |        |
| 25 |                               | 31b | Authorship eligibility guidelines and any intended use of professional writers                                                                                                                                                                                                      | _____  |
| 26 |                               |     |                                                                                                                                                                                                                                                                                     |        |
| 27 |                               | 31c | Plans, if any, for granting public access to the full protocol, participant-level dataset, and statistical code                                                                                                                                                                     | _____  |
| 28 |                               |     |                                                                                                                                                                                                                                                                                     |        |
| 29 |                               |     |                                                                                                                                                                                                                                                                                     |        |
| 30 | <b>Appendices</b>             |     |                                                                                                                                                                                                                                                                                     |        |
| 31 |                               |     |                                                                                                                                                                                                                                                                                     |        |
| 32 | Informed consent materials    | 32  | Model consent form and other related documentation given to participants and authorised surrogates                                                                                                                                                                                  | _____  |
| 33 |                               |     |                                                                                                                                                                                                                                                                                     |        |
| 34 |                               |     |                                                                                                                                                                                                                                                                                     |        |
| 35 | Biological specimens          | 33  | Plans for collection, laboratory evaluation, and storage of biological specimens for genetic or molecular analysis in the current trial and for future use in ancillary studies, if applicable                                                                                      | _____  |
| 36 |                               |     |                                                                                                                                                                                                                                                                                     |        |
| 37 |                               |     |                                                                                                                                                                                                                                                                                     |        |

\*It is strongly recommended that this checklist be read in conjunction with the SPIRIT 2013 Explanation & Elaboration for important clarification on the items. Amendments to the protocol should be tracked and dated. The SPIRIT checklist is copyrighted by the SPIRIT Group under the Creative Commons [“Attribution-NonCommercial-NoDerivs 3.0 Unported”](https://creativecommons.org/licenses/by-nc-nd/3.0/) license.

## Attachment B – Assessment criteria by Frencken and Holmgren (2001)

| Score | Criteria                                                                                                                                 |
|-------|------------------------------------------------------------------------------------------------------------------------------------------|
| 0     | Present, good                                                                                                                            |
| 1     | Present, slight marginal defect for whatever reason, at any one place, which is less than 0.5 mm in depth. No repair is needed           |
| 2     | Present, marginal defect for whatever reason, at any one place which is deeper than 0.5 mm but less than 1.0 mm. Repair is needed        |
| 3     | Present, gross defect of more than 1.0 mm in depth. Repair is needed                                                                     |
| 4     | Not present, restoration has (almost) completely disappeared. Treatment is needed                                                        |
| 5     | Not present, other restorative treatment has been performed                                                                              |
| 6     | Not present, tooth has been extracted                                                                                                    |
| 7     | Present, wear and tear gradually over larger parts of the restoration but are less than 0.5 mm at the deepest point. No repair is needed |
| 8     | Present, wear and tear gradually over larger parts of the restoration which are deeper than 0.5 mm. Repair is needed                     |
| 9     | Unable to diagnose                                                                                                                       |

Note: Restorations considered to have survived are scored by codes: 0, 1 and 7; those considered to have failed by codes: 2, 3, 4 and 8; while those that are considered to be unrelated to success and failure are coded: 5 and 6.

## Attachment C – Assessment criteria by Roeleveld et al. (2006)

| Score | Criteria                                                                                                                                             |
|-------|------------------------------------------------------------------------------------------------------------------------------------------------------|
| 00    | Restoration still present, correct                                                                                                                   |
| 10    | Restoration present, slight defect at the margin and/or wear of the surface; < 0.5 mm in depth, repair needed                                        |
| 11    | Restoration present, defect at the margin and/or wear of the surface; > 0.5 mm in depth, repair needed                                               |
| 12    | Restoration present; underfilled > 0.5 mm, no gap, repair needed                                                                                     |
| 13    | Restoration overfilled > 0.5 mm, repair needed                                                                                                       |
| 20    | Secondary caries, discoloration in depth, surface hard and intact, caries within dentin; repair needed                                               |
| 21    | Secondary caries. Surface defect, caries within dentin; repair needed                                                                                |
| 30    | Restoration not present, bulk fracture, loose, (partly) lost; repair needed (if still possible without exposing the pulp)                            |
| 40    | Inflammation of the pulp (restoration still in situ, not categorized in the former categories); fistula or severe pain complaints; extraction needed |
| 50    | Tooth not present because of extraction                                                                                                              |
| 60    | Tooth not present because of shedding                                                                                                                |
| 70    | Tooth not present because of extraction                                                                                                              |
| 90    | Patient not present                                                                                                                                  |

Note: Restorations considered to have survived are scored by codes: 00 and 10; those considered to have by code: 11, 12, 13, 20, 21, 30 or 40; while those considered to be unrelated to success and failure are coded: 50, 60, 70 or 90
