# Supplementary material for: Efficacy of conventional treatment with composite resin and atraumatic restorative treatment in posterior primary teeth: study protocol for a randomised controlled trial
Source: PubMed Central journal article supplement — BMJ Open. 2017 Jul 10;7(7):e015542. doi: 10.1136/bmjopen-2016-015542 (PMC5734398; doi:10.1136/bmjopen-2016-015542), 2017-07-10
Supplement: bmjopen-2016-015542supp002.pdf [file bmjopen-2016-015542supp002.pdf]

Attachment B – Assessment criteria by Frencken and Holmgren (2001)

| Score | Criteria                                                                                                                                 |
|-------|------------------------------------------------------------------------------------------------------------------------------------------|
| 0     | Present, good                                                                                                                            |
| 1     | Present, slight marginal defect for whatever reason, at any one place, which is less than 0.5 mm in depth. No repair is needed           |
| 2     | Present, marginal defect for whatever reason, at any one place which is deeper than 0.5 mm but less than 1.0 mm. Repair is needed        |
| 3     | Present, gross defect of more than 1.0 mm in depth. Repair is needed                                                                     |
| 4     | Not present, restoration has (almost) completely disappeared. Treatment is needed                                                        |
| 5     | Not present, other restorative treatment has been performed                                                                              |
| 6     | Not present, tooth has been extracted                                                                                                    |
| 7     | Present, wear and tear gradually over larger parts of the restoration but are less than 0.5 mm at the deepest point. No repair is needed |
| 8     | Present, wear and tear gradually over larger parts of the restoration which are deeper than 0.5 mm. Repair is needed                     |
| 9     | Unable to diagnose                                                                                                                       |

Note: Restorations considered to have survived are scored by codes: 0, 1 and 7; those considered to have failed by codes: 2, 3, 4 and 8; while those that are considered to be unrelated to success and failure are coded: 5 and 6.
