# Supplementary material for: Efficacy of conventional treatment with composite resin and atraumatic restorative treatment in posterior primary teeth: study protocol for a randomised controlled trial
Source: PubMed Central journal article supplement — BMJ Open. 2017 Jul 10;7(7):e015542. doi: 10.1136/bmjopen-2016-015542 (PMC5734398; doi:10.1136/bmjopen-2016-015542), 2017-07-10
Supplement: bmjopen-2016-015542supp003.pdf [file bmjopen-2016-015542supp003.pdf]

Attachment C – Assessment criteria by Roeleveld et al. (2006)

| Score | Criteria                                                                                                                                             |
|-------|------------------------------------------------------------------------------------------------------------------------------------------------------|
| 00    | Restoration still present, correct                                                                                                                   |
| 10    | Restoration present, slight defect at the margin and/or wear of the surface; < 0.5 mm in depth, repair needed                                        |
| 11    | Restoration present, defect at the margin and/or wear of the surface; > 0.5 mm in depth, repair needed                                               |
| 12    | Restoration present; underfilled > 0.5 mm, no gap, repair needed                                                                                     |
| 13    | Restoration overfilled > 0.5 mm, repair needed                                                                                                       |
| 20    | Secondary caries, discoloration in depth, surface hard and intact, caries within dentin; repair needed                                               |
| 21    | Secondary caries. Surface defect, caries within dentin; repair needed                                                                                |
| 30    | Restoration not present, bulk fracture, loose, (partly) lost; repair needed (if still possible without exposing the pulp)                            |
| 40    | Inflammation of the pulp (restoration still in situ, not categorized in the former categories); fistula or severe pain complaints; extraction needed |
| 50    | Tooth not present because of extraction                                                                                                              |
| 60    | Tooth not present because of shedding                                                                                                                |
| 70    | Tooth not present because of extraction                                                                                                              |
| 90    | Patient not present                                                                                                                                  |

Note: Restorations considered to have survived are scored by codes: 00 and 10; those considered to have by code: 11, 12, 13, 20, 21, 30 or 40; while those considered to be unrelated to success and failure are coded: 50, 60, 70 or 90
